# Supplementary material for: An ISA-TAB-Nano based data collection framework to support data-driven modelling of nanotoxicology
Source: publisher site journal article supplement (doi:10.3762/bjnano.6.202), 2015-10-05
Supplement: Additional file 1 [file a_TOY.article_cytotoxicity.cell-viability_MTS.xls]

## Sheet: Assay file
Sample Name	Comment[percent cytotoxicity: from graph]	Comment[LOEL: from graph]	Comment [miscellaneous]	Protocol REF	Parameter Value[Instrument]	Parameter Value[Instrument Version]	Parameter Value[instrument vendor]	Parameter Value[background control]	Term Accession Number	Term Source Ref	Parameter Value[negative control]	Term Accession Number	Term Source Ref	Parameter Value[positive control]	Term Accession Number	Term Source Ref	Assay Name	Measurement Value [mean(percent cytotoxicity)]	Unit	Term Accession Number	Term Source Ref	Measurement Value [Less Than(LOEL)]	Unit	Term Accession Number	Term Source Ref
s_TOY.article_InVitro.CB_0	TRUE			cell viability assay by MTS assay							exposure medium and all additives except for nanomaterial						cell viability assay by MTS assay	7	percent	http://purl.obolibrary.org/obo/UO_0000187	UO
s_TOY.article_InVitro.CB_1	TRUE			cell viability assay by MTS assay							exposure medium and all additives except for nanomaterial						cell viability assay by MTS assay	10	percent	http://purl.obolibrary.org/obo/UO_0000187	UO
s_TOY.article_InVitro.CB_derived:0,1				cell viability assay by MTS assay							exposure medium and all additives except for nanomaterial						cell viability assay by MTS assay					25	microgram per 10^6 cells

## Sheet: Allowed Values
Comment[measurement name: from graph]
FALSE
TRUE
