# Supplementary material for: An ISA-TAB-Nano based data collection framework to support data-driven modelling of nanotoxicology
Source: publisher site journal article supplement (doi:10.3762/bjnano.6.202), 2015-10-05
Supplement: Additional file 1 [file a_TOY.article_cytotoxicity.cell-viability_MTT.xls]

## Sheet: Assay file
Sample Name	Comment[percent cytotoxicity: from graph]	Comment[LC50: from graph]	Comment[LD50: from graph]	Comment [miscellaneous]	Protocol REF	Parameter Value[negative control]	Assay Name	Measurement Value [mean(percent cytotoxicity)]	Unit	Term Accession Number	Term Source Ref	Measurement Value [standard deviation(percent cytotoxicity)]	Unit	Term Accession Number	Term Source Ref	Measurement Value [mean(LC50)]	Unit	Term Accession Number	Term Source Ref	Measurement Value [standard deviation(LC50)]	Unit	Term Accession Number	Term Source Ref	Measurement Value [mean(LD50)]	Unit	Term Accession Number	Term Source Ref	Measurement Value [standard deviation(LD50)]	Unit	Term Accession Number	Term Source Ref
s_TOY.article_InVitro.CB_2	TRUE				cell viability assay by MTT assay	exposure medium and all additives except for nanomaterial	cell viability assay by MTT assay	10	percent	http://purl.obolibrary.org/obo/UO_0000187	UO
s_TOY.article_InVitro.CB_3	TRUE				cell viability assay by MTT assay	exposure medium and all additives except for nanomaterial	cell viability assay by MTT assay	40	percent	http://purl.obolibrary.org/obo/UO_0000187	UO
s_TOY.article_InVitro.CB_4	TRUE				cell viability assay by MTT assay	exposure medium and all additives except for nanomaterial	cell viability assay by MTT assay	70	percent	http://purl.obolibrary.org/obo/UO_0000187	UO
s_TOY.article_InVitro.CB_derived:2,3,4		FALSE			cell viability assay by MTT assay	exposure medium and all additives except for nanomaterial	cell viability assay by MTT assay									0.25	milligram per liter	http://purl.obolibrary.org/obo/UO_0000273	UO					0.0005	milligram	http://purl.obolibrary.org/obo/UO_0000022	UO

## Sheet: Allowed Values
Comment[measurement name: from graph]
FALSE
TRUE
