# Supplementary material for: An ISA-TAB-Nano based data collection framework to support data-driven modelling of nanotoxicology
Source: publisher site journal article supplement (doi:10.3762/bjnano.6.202), 2015-10-05
Supplement: Additional file 1 [file a_TOY.article_cytotoxicity.sub-lethal_glutathione.xls]

## Sheet: Assay file
Sample Name	Comment[increase in biomarker level: from graph]	Protocol REF	Parameter Value[Instrument]	Parameter Value[Instrument Version]	Parameter Value[instrument vendor]	Parameter Value[background control]	Term Accession Number	Term Source Ref	Parameter Value[negative control]	Term Accession Number	Term Source Ref	Parameter Value[positive control]	Term Accession Number	Term Source Ref	Parameter Value[Biomarker]	Term Accession Number	Term Source Ref	Assay Name	Measurement Value [mean(increase in biomarker level)]	Unit	Term Accession Number	Term Source Ref	Measurement Value [standard deviation(increase in biomarker level)]	Unit	Term Accession Number	Term Source Ref
s_TOY.article_InVitro.CB_5	TRUE	oxidative stress assessment by glutathione depletion assay							exposure medium and all additives except for nanomaterial						glutathione	http://purl.obolibrary.org/obo/CHEBI_16856	CHEBI	oxidative stress assessment by glutathione depletion assay	-10	percent	http://purl.obolibrary.org/obo/UO_0000187	UO		percent	http://purl.obolibrary.org/obo/UO_0000187	UO

## Sheet: Allowed Values
Comment[measurement name: from graph]
FALSE
TRUE
