# Supplementary material for: An ISA-TAB-Nano based data collection framework to support data-driven modelling of nanotoxicology
Source: publisher site journal article supplement (doi:10.3762/bjnano.6.202), 2015-10-05
Supplement: Additional file 1 [file a_TOY.article_genotoxicity_Ames.xls]

## Sheet: Assay file
Sample Name	Comment[increase in biomarker level: from graph]	Protocol REF	Parameter Value[negative control]	Parameter Value[positive control]	Term Accession Number	Term Source Ref	Parameter Value[Biomarker]	Term Accession Number	Term Source Ref	Assay Name	Measurement Value [mean(increase in biomarker level)]	Unit	Term Accession Number	Term Source Ref	Measurement Value [standard deviation(increase in biomarker level)]	Unit	Term Accession Number	Term Source Ref	Measurement Value [study call]
s_TOY.article_InVitro.CB_6	FALSE	genotoxicity assessment by Ames test (following exposure without S9 mix)	exposure medium and all additives except for nanomaterial	(Z)-2-(2-furyl)-3-(5-nitro-2-furyl)acrylamide	http://purl.obolibrary.org/obo/CHEBI_15660	CHEBI	number of revertant colonies per plate			genotoxicity assessment by Ames test	10	percent	http://purl.obolibrary.org/obo/UO_0000187	UO	1	percent	http://purl.obolibrary.org/obo/UO_0000187	UO
s_TOY.article_InVitro.CB_7	FALSE	genotoxicity assessment by Ames test (following exposure without S9 mix)	exposure medium and all additives except for nanomaterial	(Z)-2-(2-furyl)-3-(5-nitro-2-furyl)acrylamide	http://purl.obolibrary.org/obo/CHEBI_15660	CHEBI	number of revertant colonies per plate			genotoxicity assessment by Ames test	0	percent	http://purl.obolibrary.org/obo/UO_0000187	UO	1	percent	http://purl.obolibrary.org/obo/UO_0000187	UO
s_TOY.article_InVitro.CB_8	FALSE	genotoxicity assessment by Ames test (following exposure with S9 mix)	exposure medium and all additives except for nanomaterial	anthracen-2-amine	http://purl.obolibrary.org/obo/CHEBI_34260	CHEBI	number of revertant colonies per plate			genotoxicity assessment by Ames test	10	percent	http://purl.obolibrary.org/obo/UO_0000187	UO	1	percent	http://purl.obolibrary.org/obo/UO_0000187	UO
s_TOY.article_InVitro.CB_9	FALSE	genotoxicity assessment by Ames test (following exposure with S9 mix)	exposure medium and all additives except for nanomaterial	anthracen-2-amine	http://purl.obolibrary.org/obo/CHEBI_34260	CHEBI	number of revertant colonies per plate			genotoxicity assessment by Ames test	0	percent	http://purl.obolibrary.org/obo/UO_0000187	UO	2	percent	http://purl.obolibrary.org/obo/UO_0000187	UO
s_TOY.article_InVitro.CB_derived:6,7,8,9		genotoxicity assessment by Ames test (derivation of overall study call)	exposure medium and all additives except for nanomaterial				number of revertant colonies per plate			genotoxicity assessment by Ames test									positive

## Sheet: Allowed Values
Comment[measurement name: from graph]	study_call
FALSE	positive
TRUE	negative
	equivocal
