# Supplementary material for: An ISA-TAB-Nano based data collection framework to support data-driven modelling of nanotoxicology
Source: publisher site journal article supplement (doi:10.3762/bjnano.6.202), 2015-10-05
Supplement: Additional file 1 [file a_TOY.article_PC_AAN_BETapproach.xls]

## Sheet: Assay file
Sample Name	Comment[average agglomeration number: from graph]	Protocol REF	Parameter Value[size assay]	Term Accession Number	Term Source Ref	Parameter Value[density estimation approach]	Term Accession Number	Term Source Ref	Parameter Value[Instrument]	Parameter Value[Instrument Version]	Parameter Value[instrument vendor]	Assay Name	Measurement Value [average agglomeration number]
s_TOY.article_PC_19	FALSE	determination of average agglomeration number from specific surface area obtained via BET gas adsorption, median diameter obtained via dynamic light scattering and particle density obtained via density of bulk TiO2 taken from CRC Handbook of Chemistry and Physics as per Cohen et al. 2014 [doi:10.1186/1743-8977-11-20]	dynamic light scattering	http://purl.bioontology.org/ontology/npo#NPO_1469	NPO	density of bulk TiO2 taken from CRC Handbook of Chemistry and Physics as per Cohen et al. 2014 [doi:10.1186/1743-8977-11-20]						determination of average agglomeration number from specific surface area obtained via BET gas adsorption, median diameter obtained via dynamic light scattering and particle density obtained via density of bulk TiO2 taken from CRC Handbook of Chemistry and Physics as per Cohen et al. 2014 [doi:10.1186/1743-8977-11-20]	2.5

## Sheet: Allowed Values
Comment[measurement name: from graph]	physical state.values	physical state.TermAccessionNumber	physical state.TermSourceREF
FALSE	state of suspension	http://purl.bioontology.org/ontology/npo#NPO_1506	NPO
TRUE	powdered state	http://purl.bioontology.org/ontology/npo#NPO_1515	NPO
	state of mixture	http://purl.bioontology.org/ontology/npo#NPO_1505	NPO
