# Supplementary material for: An ISA-TAB-Nano based data collection framework to support data-driven modelling of nanotoxicology
Source: publisher site journal article supplement (doi:10.3762/bjnano.6.202), 2015-10-05
Supplement: Additional file 1 [file a_TOY.article_PC_adsorption_gas.chromatography.xls]

## Sheet: Assay file
Sample Name	Comment[primary particle measurements]	Comment[adsorption constant: from graph]	Comment[adsorption percentage: from graph]	Comment[equilibrium adsorption percentage: from graph]	Protocol REF	Parameter Value[Instrument]	Parameter Value[Instrument Version]	Parameter Value[instrument vendor]	Assay Name	Factor Value [physical state (assay preparation)]	Term Accession Number	Term Source Ref	Measurement Value[mean(adsorption constant)]	Measurement Value[mean(adsorption percentage)]	Measurement Value[mean(equilibrium adsorption percentage)]
s_TOY.article_PC_20		FALSE			adsorption determination by gas chromatography mass spectrometry				adsorption determination by gas chromatography mass spectrometry				1.8

## Sheet: Allowed Values
Comment[measurement name: from graph]	physical state.values	physical state.TermAccessionNumber	physical state.TermSourceREF	Comment[primary particle measurements]
FALSE	state of suspension	http://purl.bioontology.org/ontology/npo#NPO_1506	NPO	TRUE
TRUE	powdered state	http://purl.bioontology.org/ontology/npo#NPO_1515	NPO	FALSE
	state of mixture	http://purl.bioontology.org/ontology/npo#NPO_1505	NPO
