# Supplementary material for: An ISA-TAB-Nano based data collection framework to support data-driven modelling of nanotoxicology
Source: publisher site journal article supplement (doi:10.3762/bjnano.6.202), 2015-10-05
Supplement: Additional file 1 [file a_TOY.article_PC_crystallinity_XRD.xls]

## Sheet: Assay file
Sample Name	Comment[primary particle measurements]	Comment[Amorphous phase proportion: from graph]	Comment[Major crystalline phase proportion: from graph]	Comment[Minor crystalline phase proportion: from graph]	Protocol REF	Parameter Value[Instrument]	Parameter Value[Instrument Version]	Parameter Value[instrument vendor]	Assay Name	Factor Value [physical state (assay preparation)]	Term Accession Number	Term Source Ref	Measurement Value [Amorphous phase proportion]	Unit	Term Accession Number	Term Source Ref	Measurement Value [Major crystalline phase]	Term Accession Number	Term Source Ref	Measurement Value [Major crystalline phase proportion]	Unit	Term Accession Number	Term Source Ref	Measurement Value [Minor crystalline phase]	Term Accession Number	Term Source Ref	Measurement Value [Minor crystalline phase proportion]	Unit	Term Accession Number	Term Source Ref
s_TOY.article_PC_18		FALSE	FALSE		crystallinity determination by X-ray diffraction	D2 PHASER		Bruker	crystallinity determination by X-ray diffraction	powdered state	http://purl.bioontology.org/ontology/npo#NPO_1515	NPO	0	percent	http://purl.obolibrary.org/obo/UO_0000187	UO	rutile	http://purl.obolibrary.org/obo/CHEBI_46748	CHEBI	100	percent	http://purl.obolibrary.org/obo/UO_0000187	UO

## Sheet: Allowed Values
Comment[measurement name: from graph]	Primary particle comments	physical state.values	physical state.TermAccessionNumber	physical state.TermSourceREF
FALSE	TRUE	state of suspension	http://purl.bioontology.org/ontology/npo#NPO_1506	NPO
TRUE	FALSE	powdered state	http://purl.bioontology.org/ontology/npo#NPO_1515	NPO
		state of mixture	http://purl.bioontology.org/ontology/npo#NPO_1505	NPO
