# Supplementary material for: An ISA-TAB-Nano based data collection framework to support data-driven modelling of nanotoxicology
Source: publisher site journal article supplement (doi:10.3762/bjnano.6.202), 2015-10-05
Supplement: Additional file 1 [file a_TOY.article_PC_dissolution.conc_of.Ti4+_dialysisSeparation_ICP-MS.xls]

## Sheet: Assay file
Sample Name	Comment[analyte concentration: from graph]	Comment[analyte saturation concentration: from graph]	Protocol REF	Parameter Value[separation technique]	Term Accession Number	Term Source Ref	Parameter Value[separation pore size]	Unit	Term Accession Number	Term Source Ref	Parameter Value[analyte role]	Term Accession Number	Term Source Ref	Parameter Value[Instrument]	Parameter Value[Instrument Version]	Parameter Value[instrument vendor]	Assay Name	Factor Value [physical state (assay preparation)]	Term Accession Number	Term Source Ref	Measurement Value[mean(analyte concentration)]	Unit	Term Accession Number	Term Source Ref	Measurement Value[mean(analyte saturate concentration)]	Unit	Term Accession Number	Term Source Ref
s_TOY.article_PC_11	TRUE		dissolution concentration of Ti4+ cation separated by dialysis and measured by inductively coupled plasma mass spectrometry	dialysis	http://purl.obolibrary.org/obo/CHMO_0001522	CHMO	20	nanometer	http://purl.org/obo/owl/UO#UO_0000018	NPO	Ti4+ cation						dissolution concentration of Ti4+ cation separated by dialysis and measured by inductively coupled plasma mass spectrometry	state of suspension	http://purl.bioontology.org/ontology/npo#NPO_1506	NPO	0.005	microgram per liter	http://purl.obolibrary.org/obo/UO_0000301	UO
s_TOY.article_PC_12	TRUE		dissolution concentration of Ti4+ cation separated by dialysis and measured by inductively coupled plasma mass spectrometry	dialysis	http://purl.obolibrary.org/obo/CHMO_0001522	CHMO	20	nanometer	http://purl.org/obo/owl/UO#UO_0000018	NPO	Ti4+ cation						dissolution concentration of Ti4+ cation separated by dialysis and measured by inductively coupled plasma mass spectrometry	state of suspension	http://purl.bioontology.org/ontology/npo#NPO_1506	NPO	0.01	microgram per liter	http://purl.obolibrary.org/obo/UO_0000301	UO
s_TOY.article_PC_13	TRUE		dissolution concentration of Ti4+ cation separated by dialysis and measured by inductively coupled plasma mass spectrometry	dialysis	http://purl.obolibrary.org/obo/CHMO_0001522	CHMO	20	nanometer	http://purl.org/obo/owl/UO#UO_0000018	NPO	Ti4+ cation						dissolution concentration of Ti4+ cation separated by dialysis and measured by inductively coupled plasma mass spectrometry	state of suspension	http://purl.bioontology.org/ontology/npo#NPO_1506	NPO	0.011	microgram per liter	http://purl.obolibrary.org/obo/UO_0000301	UO
s_TOY.article_PC_14	TRUE		dissolution concentration of Ti4+ cation separated by dialysis and measured by inductively coupled plasma mass spectrometry	dialysis	http://purl.obolibrary.org/obo/CHMO_0001522	CHMO	20	nanometer	http://purl.org/obo/owl/UO#UO_0000018	NPO	Ti4+ cation						dissolution concentration of Ti4+ cation separated by dialysis and measured by inductively coupled plasma mass spectrometry	state of suspension	http://purl.bioontology.org/ontology/npo#NPO_1506	NPO	0.012	microgram per liter	http://purl.obolibrary.org/obo/UO_0000301	UO
s_TOY.article_PC_15	TRUE		dissolution concentration of Ti4+ cation separated by dialysis and measured by inductively coupled plasma mass spectrometry	dialysis	http://purl.obolibrary.org/obo/CHMO_0001522	CHMO	20	nanometer	http://purl.org/obo/owl/UO#UO_0000018	NPO	Ti4+ cation						dissolution concentration of Ti4+ cation separated by dialysis and measured by inductively coupled plasma mass spectrometry	state of suspension	http://purl.bioontology.org/ontology/npo#NPO_1506	NPO	0.013	microgram per liter	http://purl.obolibrary.org/obo/UO_0000301	UO
s_TOY.article_PC_16	TRUE		dissolution concentration of Ti4+ cation separated by dialysis and measured by inductively coupled plasma mass spectrometry	dialysis	http://purl.obolibrary.org/obo/CHMO_0001522	CHMO	20	nanometer	http://purl.org/obo/owl/UO#UO_0000018	NPO	Ti4+ cation						dissolution concentration of Ti4+ cation separated by dialysis and measured by inductively coupled plasma mass spectrometry	state of suspension	http://purl.bioontology.org/ontology/npo#NPO_1506	NPO	0.014	microgram per liter	http://purl.obolibrary.org/obo/UO_0000301	UO

## Sheet: Allowed Values
Comment[measurement name: from graph]	physical state.values	physical state.TermAccessionNumber	physical state.TermSourceREF
FALSE	state of suspension	http://purl.bioontology.org/ontology/npo#NPO_1506	NPO
TRUE	powdered state	http://purl.bioontology.org/ontology/npo#NPO_1515	NPO
	state of mixture	http://purl.bioontology.org/ontology/npo#NPO_1505	NPO
