# Supplementary material for: An ISA-TAB-Nano based data collection framework to support data-driven modelling of nanotoxicology
Source: publisher site journal article supplement (doi:10.3762/bjnano.6.202), 2015-10-05
Supplement: Additional file 1 [file a_TOY.article_PC_dissolution.fraction-dissolved_NoSeparation_AbsSpec.xls]

## Sheet: Assay file
Sample Name	Comment[fraction dissolved: from graph]	Comment[equilibrium fraction dissolved: from graph]	Protocol REF	Parameter Value[separation technique]	Term Accession Number	Term Source Ref	Parameter Value[separation pore size]	Unit	Term Accession Number	Term Source Ref	Parameter Value[analyte role]	Term Accession Number	Term Source Ref	Parameter Value[Instrument]	Parameter Value[Instrument Version]	Parameter Value[instrument vendor]	Assay Name	Factor Value [physical state (assay preparation)]	Term Accession Number	Term Source Ref	Measurement Value[mean(fraction dissolved)]	Unit	Term Accession Number	Term Source Ref	Measurement Value[mean(equilibrium fraction dissolved)]	Unit	Term Accession Number	Term Source Ref
s_TOY.article_PC_17	TRUE		determination of fraction dissolved via analysis of titanium dioxide (no separation) and measured by absorption spectroscopy	N/A							titanium dioxide	http://purl.bioontology.org/ontology/npo#NPO_1485	NPO				determination of fraction dissolved via analysis of titanium dioxide (no separation) and measured by absorption spectroscopy	state of suspension	http://purl.bioontology.org/ontology/npo#NPO_1506	NPO	0.1	percent	http://purl.obolibrary.org/obo/UO_0000187	UO

## Sheet: Allowed Values
Comment[measurement name: from graph]	physical state.values	physical state.TermAccessionNumber	physical state.TermSourceREF
FALSE	state of suspension	http://purl.bioontology.org/ontology/npo#NPO_1506	NPO
TRUE	powdered state	http://purl.bioontology.org/ontology/npo#NPO_1515	NPO
	state of mixture	http://purl.bioontology.org/ontology/npo#NPO_1505	NPO
