# Supplementary material for: An ISA-TAB-Nano based data collection framework to support data-driven modelling of nanotoxicology
Source: publisher site journal article supplement (doi:10.3762/bjnano.6.202), 2015-10-05
Supplement: Additional file 1 [file a_TOY.article_PC_dissolution.rate_of.TiO2_dialysisSeparation_ICP-MS.xls]

## Sheet: Assay file
Sample Name	Comment[overall dissolution rate: from graph]	Comment[forward dissolution rate: from graph]	Protocol REF	Parameter Value[surface area measurement technique]	Term Accession Number	Term Source Ref	Parameter Value[separation technique]	Term Accession Number	Term Source Ref	Parameter Value[separation pore size]	Unit	Term Accession Number	Term Source Ref	Parameter Value[analyte role]	Term Accession Number	Term Source Ref	Parameter Value[Instrument]	Parameter Value[Instrument Version]	Parameter Value[instrument vendor]	Assay Name	Factor Value [physical state (assay preparation)]	Term Accession Number	Term Source Ref	Measurement Value[mean(overall dissolution rate)]	Unit	Term Accession Number	Term Source Ref	Measurement Value[mean(forward dissolution rate)]	Unit	Term Accession Number	Term Source Ref
s_TOY.article_PC_derived:11,12,13,14,15,16		FALSE	dissolution rate based on analysis of Ti4+ cation separated by dialysis, measured by inductively coupled plasma mass spectrometry and normalised to the surface area determined via BET gas adsorption	BET gas adsorption			dialysis	http://purl.obolibrary.org/obo/CHMO_0001522	CHMO	20	nanometer	http://purl.org/obo/owl/UO#UO_0000018	NPO	Ti4+ cation						dissolution rate based on analysis of Ti4+ cation separated by dialysis, measured by inductively coupled plasma mass spectrometry and normalised to the surface area determined via BET gas adsorption	state of suspension	http://purl.bioontology.org/ontology/npo#NPO_1506	NPO					1e-13	mole per second per square centimeter

## Sheet: Allowed Values
Comment[measurement name: from graph]	physical state.values	physical state.TermAccessionNumber	physical state.TermSourceREF
FALSE	state of suspension	http://purl.bioontology.org/ontology/npo#NPO_1506	NPO
TRUE	powdered state	http://purl.bioontology.org/ontology/npo#NPO_1515	NPO
	state of mixture	http://purl.bioontology.org/ontology/npo#NPO_1505	NPO
