# Supplementary material for: An ISA-TAB-Nano based data collection framework to support data-driven modelling of nanotoxicology
Source: publisher site journal article supplement (doi:10.3762/bjnano.6.202), 2015-10-05
Supplement: Additional file 1 [file a_TOY.article_PC_logP_HPLC.xls]

## Sheet: Assay file
Sample Name	Comment[logP: from graph]	Protocol REF	Parameter Value[Instrument]	Parameter Value[Instrument Version]	Parameter Value[instrument vendor]	Assay Name	Factor Value [physical state (assay preparation)]	Term Accession Number	Term Source Ref	Measurement Value[mean(logP)]
s_TOY.article_PC_10	FALSE	logP determination by HPLC	HPLC column	Cosmosil 5PBB column		logP determination by HPLC				7

## Sheet: Allowed Values
Comment[measurement name: from graph]	physical state.values	physical state.TermAccessionNumber	physical state.TermSourceREF
FALSE	state of suspension	http://purl.bioontology.org/ontology/npo#NPO_1506	NPO
TRUE	powdered state	http://purl.bioontology.org/ontology/npo#NPO_1515	NPO
	state of mixture	http://purl.bioontology.org/ontology/npo#NPO_1505	NPO
