# Supplementary material for: An ISA-TAB-Nano based data collection framework to support data-driven modelling of nanotoxicology
Source: publisher site journal article supplement (doi:10.3762/bjnano.6.202), 2015-10-05
Supplement: Additional file 1 [file a_TOY.article_PC_reactivity.rateofchange_of.H2O2_CapillaryColumnSeparation.xls]

## Sheet: Assay file
Sample Name	Comment [type of quantum yield]	Comment[concentration of analyte: from graph]	Comment[quantum yield: from graph]	Protocol REF	Parameter Value[type of reaction]	Term Accession Number	Term Source Ref	Parameter Value[surface area measurement technique]	Term Accession Number	Term Source Ref	Parameter Value[separation technique]	Term Accession Number	Term Source Ref	Parameter Value[separation pore size]	Unit	Term Accession Number	Term Source Ref	Parameter Value[analyte role]	Term Accession Number	Term Source Ref	Parameter Value[reaction role of analyte]	Term Accession Number	Term Source Ref	Parameter Value[Instrument]	Parameter Value[Instrument Version]	Parameter Value[instrument vendor]	Assay Name	Factor Value [physical state (assay preparation)]	Term Accession Number	Term Source Ref	Measurement Value[mean(concentration of analyte)]	Unit	Term Accession Number	Term Source Ref	Measurement Value [mean(quantum yield)]	Unit	Term Accession Number	Term Source Ref
s_TOY.article_PC_7		TRUE		reactivity based on analysis of hydrogen peroxide separated by capillary column separation, measured by gas chromatography-mass spectrometry	photochemical reaction	http://purl.obolibrary.org/obo/REX_0000033	REX	N/A			capillary column	http://purl.obolibrary.org/obo/CHMO_0000987	CHMO	25	meter	http://purl.obolibrary.org/obo/UO_0000008	UO	hydrogen peroxide	http://purl.obolibrary.org/obo/CHEBI_16240	CHEBI	product role	http://semanticscience.org/resource/SIO_000798	SIO	GC-MS	589015989A	Hewlett Packard	reactivity based on analysis of hydrogen peroxide separated by capillary column separation, measured by gas chromatography-mass spectrometry	state of suspension	http://purl.bioontology.org/ontology/npo#NPO_1506	NPO	0	millimolar	http://purl.obolibrary.org/obo/UO_0000063	UO
s_TOY.article_PC_8		TRUE		reactivity based on analysis of hydrogen peroxide separated by capillary column separation, measured by gas chromatography-mass spectrometry	photochemical reaction	http://purl.obolibrary.org/obo/REX_0000033	REX	N/A			capillary column	http://purl.obolibrary.org/obo/CHMO_0000987	CHMO	25	meter	http://purl.obolibrary.org/obo/UO_0000008	UO	hydrogen peroxide	http://purl.obolibrary.org/obo/CHEBI_16240	CHEBI	product role	http://semanticscience.org/resource/SIO_000798	SIO	GC-MS	589015989A	Hewlett Packard	reactivity based on analysis of hydrogen peroxide separated by capillary column separation, measured by gas chromatography-mass spectrometry	state of suspension	http://purl.bioontology.org/ontology/npo#NPO_1506	NPO	1.18	millimolar	http://purl.obolibrary.org/obo/UO_0000063	UO
s_TOY.article_PC_9		TRUE		reactivity based on analysis of hydrogen peroxide separated by capillary column separation, measured by gas chromatography-mass spectrometry	photochemical reaction	http://purl.obolibrary.org/obo/REX_0000033	REX	N/A			capillary column	http://purl.obolibrary.org/obo/CHMO_0000987	CHMO	25	meter	http://purl.obolibrary.org/obo/UO_0000008	UO	hydrogen peroxide	http://purl.obolibrary.org/obo/CHEBI_16240	CHEBI	product role	http://semanticscience.org/resource/SIO_000798	SIO	GC-MS	589015989A	Hewlett Packard	reactivity based on analysis of hydrogen peroxide separated by capillary column separation, measured by gas chromatography-mass spectrometry	state of suspension	http://purl.bioontology.org/ontology/npo#NPO_1506	NPO	1.18	millimolar	http://purl.obolibrary.org/obo/UO_0000063	UO
s_TOY.article_PC_derived:7,8,9	peroxide production		FALSE	reactivity based on analysis of hydrogen peroxide separated by capillary column separation, measured by gas chromatography-mass spectrometry	photochemical reaction	http://purl.obolibrary.org/obo/REX_0000033	REX	N/A			capillary column	http://purl.obolibrary.org/obo/CHMO_0000987	CHMO	25	meter	http://purl.obolibrary.org/obo/UO_0000008	UO	hydrogen peroxide	http://purl.obolibrary.org/obo/CHEBI_16240	CHEBI	product role	http://semanticscience.org/resource/SIO_000798	SIO	GC-MS	589015989A	Hewlett Packard	reactivity based on analysis of hydrogen peroxide separated by capillary column separation, measured by gas chromatography-mass spectrometry	state of suspension	http://purl.bioontology.org/ontology/npo#NPO_1506	NPO					3.4	percent	http://purl.obolibrary.org/obo/UO_0000187	UO

## Sheet: Allowed Values
Comment[measurement name: from graph]	physical state.values	physical state.TermAccessionNumber	physical state.TermSourceREF
FALSE	state of suspension	http://purl.bioontology.org/ontology/npo#NPO_1506	NPO
TRUE	powdered state	http://purl.bioontology.org/ontology/npo#NPO_1515	NPO
	state of mixture	http://purl.bioontology.org/ontology/npo#NPO_1505	NPO
