# Supplementary material for: An ISA-TAB-Nano based data collection framework to support data-driven modelling of nanotoxicology
Source: publisher site journal article supplement (doi:10.3762/bjnano.6.202), 2015-10-05
Supplement: Additional file 1 [file a_TOY.article_PC_shape_TEM.xls]

## Sheet: Assay file
Sample Name	Comment[primary particle measurements]	Comment[primary particle images]	Comment[aspect ratio: from graph]	Protocol REF	Parameter Value[Instrument]	Parameter Value[Instrument Version]	Parameter Value[instrument vendor]	Assay Name	Factor Value [physical state (assay preparation)]	Term Accession Number	Term Source Ref	Measurement Value[shape]	Term Accession Number	Term Source Ref	Measurement Value[mean of the number distribution(aspect ratio)]	Image File
s_TOY.article_PC_1	TRUE	FALSE	FALSE	shape determination by transmission electron microscopy				shape determination by transmission electron microscopy	powdered state	http://purl.bioontology.org/ontology/npo#NPO_1515	NPO	rod-shaped	http://purl.bioontology.org/ontology/npo#NPO_461	NPO	2.5	ImageLink_1_for_TOY.article.xls

## Sheet: Allowed Values
Comment[measurement name: from graph]	Primary particle comments	Shape:value	Shape:ontology.term.accession.number	Shape:ontology.reference	Shape:comment	physical state.values	physical state.TermAccessionNumber	physical state.TermSourceREF
FALSE	TRUE					state of suspension	http://purl.bioontology.org/ontology/npo#NPO_1506	NPO
TRUE	FALSE	conical shape	http://purl.bioontology.org/ontology/npo#NPO_515	NPO		powdered state	http://purl.bioontology.org/ontology/npo#NPO_1515	NPO
		cylindrical shape	http://purl.bioontology.org/ontology/npo#NPO_100	NPO
		disc-shaped	http://purl.bioontology.org/ontology/npo#NPO_307	NPO
		rod-shaped	http://purl.bioontology.org/ontology/npo#NPO_461	NPO
		needle shape	http://purl.bioontology.org/ontology/npo#NPO_852	NPO
		ellipsoidal shape	http://purl.bioontology.org/ontology/npo#NPO_156	NPO
		spherical shape	http://purl.bioontology.org/ontology/npo#NPO_286	NPO
		spheroidal shape	http://purl.bioontology.org/ontology/npo#NPO_320	NPO
		oblate spheroidal shape	http://purl.bioontology.org/ontology/npo#NPO_241	NPO
		prolate spheroidal shape	http://purl.bioontology.org/ontology/npo#NPO_102	NPO
		elliptical shape	http://purl.bioontology.org/ontology/npo#NPO_850	NPO
		circular shape	http://purl.bioontology.org/ontology/npo#NPO_342	NPO
		polyhedral shape	http://purl.bioontology.org/ontology/npo#NPO_858	NPO
		hexahedral shape	http://purl.bioontology.org/ontology/npo#NPO_666	NPO
		cubical shape	http://purl.bioontology.org/ontology/npo#NPO_861	NPO
		other
