# Supplementary material for: An ISA-TAB-Nano based data collection framework to support data-driven modelling of nanotoxicology
Source: publisher site journal article supplement (doi:10.3762/bjnano.6.202), 2015-10-05
Supplement: Additional file 1 [file a_TOY.article_PC_size_DLS.xls]

## Sheet: Assay file
Sample Name	Comment[primary particle measurements]	Comment[hydrodynamic diameter: from graph]	Comment[polydispersity index: from graph]	Protocol REF	Parameter Value[Instrument]	Parameter Value[Instrument Version]	Parameter Value[instrument vendor]	Assay Name	Factor Value [physical state (assay preparation)]	Term Accession Number	Term Source Ref	Measurement Value[z-average(hydrodynamic diameter)]	Unit	Term Accession Number	Term Source Ref	Measurement Value[polydispersity index]
s_TOY.article_PC_3	FALSE	TRUE	FALSE	size determination by DLS	Zetasizer Nano ZSP		Malvern Instruments Ltd	size determination by DLS	state of suspension	http://purl.bioontology.org/ontology/npo#NPO_1506	NPO	70	nanometer	http://purl.org/obo/owl/UO#UO_0000018	NPO	0.5

## Sheet: Allowed Values
Comment[measurement name: from graph]	Primary particle comments	physical state.values	physical state.TermAccessionNumber	physical state.TermSourceREF
FALSE	TRUE	state of suspension	http://purl.bioontology.org/ontology/npo#NPO_1506	NPO
TRUE	FALSE	powdered state	http://purl.bioontology.org/ontology/npo#NPO_1515	NPO
