# Supplementary material for: An ISA-TAB-Nano based data collection framework to support data-driven modelling of nanotoxicology
Source: publisher site journal article supplement (doi:10.3762/bjnano.6.202), 2015-10-05
Supplement: Additional file 1 [file a_TOY.article_PC_zetapotential_LDV.xls]

## Sheet: Assay file
Sample Name	Comment[zeta potential: from graph]	Protocol REF	Parameter Value[Instrument]	Parameter Value[Instrument Version]	Parameter Value[instrument vendor]	Assay Name	Factor Value [physical state (assay preparation)]	Term Accession Number	Term Source Ref	Measurement Value[zeta potential]	Unit	Term Accession Number	Term Source Ref
s_TOY.article_PC_4	FALSE	zeta potential determination by laser Doppler velocimetry	Zetasizer Nano-ZS		Malvern Instruments	zeta potential determination by laser Doppler velocimetry	state of suspension	http://purl.bioontology.org/ontology/npo#NPO_1506	NPO	-14	millivolt	http://purl.obolibrary.org/obo/UO_0000247	UO

## Sheet: Allowed Values
Comment[measurement name: from graph]	physical state.values	physical state.TermAccessionNumber	physical state.TermSourceREF
FALSE	state of suspension	http://purl.bioontology.org/ontology/npo#NPO_1506	NPO
TRUE	powdered state	http://purl.bioontology.org/ontology/npo#NPO_1515	NPO
