# Supplementary material for: An ISA-TAB-Nano based data collection framework to support data-driven modelling of nanotoxicology
Source: publisher site journal article supplement (doi:10.3762/bjnano.6.202), 2015-10-05
Supplement: Additional file 1 [file i_TOY.article.xls]

## Sheet: Investigation file
ONTOLOGY SOURCE REFERENCE
Term Source Name	NCIT	SIO	UO	MEDDRA	NPO	CHEMINF	OBI	CHEBI	EFO	CCONT	BTO	BAO	JERM	CHMO	BCTEO	HUPSON	SBO	STATO	TEDDY	NMR	REX	EXO	MMO
Term Source File	http://data.bioontology.org/ontologies/NCIT	http://data.bioontology.org/ontologies/SIO	http://data.bioontology.org/ontologies/UO	http://purl.bioontology.org/ontology/MEDDRA	http://data.bioontology.org/ontologies/NPO	http://data.bioontology.org/ontologies/CHEMINF	http://data.bioontology.org/ontologies/OBI	http://data.bioontology.org/ontologies/CHEBI	http://data.bioontology.org/ontologies/EFO	http://data.bioontology.org/ontologies/CCONT	http://data.bioontology.org/ontologies/BTO	http://data.bioontology.org/ontologies/BAO	http://data.bioontology.org/ontologies/JERM	http://data.bioontology.org/ontologies/CHMO	http://data.bioontology.org/ontologies/BCTEO	http://data.bioontology.org/ontologies/HUPSON	http://data.bioontology.org/ontologies/SBO	http://data.bioontology.org/ontologies/STATO	http://data.bioontology.org/ontologies/TEDDY	http://data.bioontology.org/ontologies/NMR	http://data.bioontology.org/ontologies/REX	http://data.bioontology.org/ontologies/EXO	http://data.bioontology.org/ontologies/MMO
Term Source Version	24	43	42	2013AA	31	29	21	79	119	2	22	19	14	5	3	1	189	10	11	7	6	3	45
Term Source Description	National Cancer Institute Thesaurus	Semanticscience Integrated Ontology	Units of Measurement Ontology	Medical Dictionary for Regulatory Activities	NanoParticle Ontology	Chemical Information Ontology	Ontology for Biomedical Investigations	Chemical Entities of Biological Interest Ontology	Experimental Factor Ontology	Cell Culture Ontology	BRENDA Tissue and Enzyme Source Ontology	BioAssay Ontology	SysMO JERM Ontology of Systems Biology for Micro-Organisms	Chemical Methods Ontology	Bone and Cartilage Tissue Engineering Ontology	Human Physiology Simulation Ontology	Systems Biology Ontology	Statistics Ontology	Terminology for the Description of Dynamics	NMR-Instrument Component of Metabolomics Investigations Ontology	Physico-Chemical Process	Exposure Ontology	Measurement Method Ontology
INVESTIGATION
Investigation Identifier	TOY.article
Investigation Title	TOY.article
Investigation Description
Investigation Submission Date
Investigation Public Release Date
Investigation Disease
Investigation Disease Term Accession Number
Investigation Disease Term Source REF
Investigation Outcome
Comment[GLP]	FALSE
INVESTIGATION PUBLICATIONS
Investigation PubMed ID
Investigation Publication DOI	TOY.article	another.hypothetical.article
Investigation Publication Author List
Investigation Publication Title	TOY article: a hypothetical article reporting data corresponding to almost all template files prepared within the NanoPUZZLES project	Another hypothetical article reporting some additional data, for exactly the same original nanomaterial samples, corresponding to the remaining NanoPUZZLES template files (a_InvID_PC_solubility_Method.xls): solubility data for fullerenes
Investigation Publication Status
Investigation Publication Status Term Accession Number
Investigation Publication Status Term Source REF
Comment[Publication Roles]	primary reference	secondary reference
Comment[URL]	http://www.IAMINVENTED.org.uk	http://www.IAMALSOINVENTED.org.uk
INVESTIGATION CONTACTS
Investigation Person Last Name	Marchese Robinson
Investigation Person First Name	Richard
Investigation Person Mid Initials	L
Investigation Person Email	R.L.MarcheseRobinson@ljmu.ac.uk
Investigation Person Phone
Investigation Person Fax
Investigation Person Address
Investigation Person Affiliation	NanoPUZZLES project; LJMU
Investigation Person Roles	literature curation
Investigation Person Roles Term Accession Number	http://semanticscience.org/resource/SIO_000998
Investigation Person Roles Term Source REF	SIO
Comment[Investigation statistics]
Comment[Statistic name]	z-average	minimum	maximum	mean	standard deviation	median	mean of the number distribution	standard deviation of the number distribution	median of the volume distribution	Less Than
Comment[Statistic name Term Accession Number]	http://purl.bioontology.org/ontology/npo#NPO_1916	http://ncicb.nci.nih.gov/xml/owl/EVS/Thesaurus.owl#C25570	http://ncicb.nci.nih.gov/xml/owl/EVS/Thesaurus.owl#C25564	http://purl.bioontology.org/ontology/npo#NPO_1800	http://purl.bioontology.org/ontology/npo#NPO_1804	http://purl.bioontology.org/ontology/npo#NPO_1801				http://ncicb.nci.nih.gov/xml/owl/EVS/Thesaurus.owl#C61585
Comment[Statistic name Term Source REF]	NPO	NCIT	NCIT	NPO	NPO	NPO				NCIT
MATERIAL
Material File Name	m_TiO2_TOY.article.xls	m_fullerene_TOY.article.xls
Material Source Name	TiO2_TOY.article	fullerene_TOY.article
STUDY
Study Identifier	TOY.article_PC
Study Title	Physicochemical/structural characterisation of nanomaterials corresponding to this Investigation: TOY.article
Study Description
Study Submission Date
Study Public Release Date
Study Disease
Study Disease Term Accession Number
Study Disease Term Source REF
Study Outcome
Study File Name	s_TOY.article_PC.xls
STUDY DESIGN DESCRIPTORS
Study Design Type	physicochemical characterization
Study Design Type Term Accession Number	http://purl.bioontology.org/ontology/npo#NPO_1356
Study Design Type Term Source REF	NPO
STUDY PUBLICATIONS
Study PubMed ID
Study Publication DOI
Study Publication Author List
Study Publication Title
Study Publication Status
Study Publication Status Term Accession Number
Study Publication Status Term Source REF
STUDY FACTORS
Study Factor Name	physical state	particle concentration	medium	blood serum	blood serum concentration	blood serum heat treatment	blood serum organism	medium Exposure Duration	pH value	Sonication Strength	Sonication Duration	Stirring	vortex shaking	temperature value	dispersant aid	dispersant aid concentration	Sonication	physical state (assay preparation)	light source	artificial light wavelength classification	artificial light wavelength	probe	probe concentration prior to adsorption
Study Factor Type	physical state	particle concentration	medium	blood serum	concentration		organism	Exposure Duration	pH value		Duration		vortex shaking	temperature value		concentration	Sonication	physical state	light		wavelength	probe	concentration
Study Factor Type Term Accession Number	http://purl.bioontology.org/ontology/npo#NPO_888	http://purl.bioontology.org/ontology/npo#NPO_1830	http://purl.bioontology.org/ontology/npo#NPO_1853	http://purl.obolibrary.org/obo/BTO_0000133	http://purl.bioontology.org/ontology/npo#NPO_1167		http://purl.obolibrary.org/obo/OBI_0100026	http://ncicb.nci.nih.gov/xml/owl/EVS/Thesaurus.owl#C83280	http://purl.bioontology.org/ontology/npo#NPO_1814		http://ncicb.nci.nih.gov/xml/owl/EVS/Thesaurus.owl#C25330		http://purl.bioontology.org/ontology/npo#NPO_1952	http://purl.bioontology.org/ontology/npo#NPO_1806		http://purl.bioontology.org/ontology/npo#NPO_1167	http://ncicb.nci.nih.gov/xml/owl/EVS/Thesaurus.owl#C81871	http://purl.bioontology.org/ontology/npo#NPO_888	http://www.ebi.ac.uk/efo/EFO_0000568		http://www.bioassayontology.org/bao#BAO_0000565	http://purl.obolibrary.org/obo/CHEBI_50406	http://purl.bioontology.org/ontology/npo#NPO_1167
Study Factor Type Term Source REF	NPO	NPO	NPO	EFO	NPO		EFO	NCIT	NPO		NCIT		NPO	NPO		NPO	NCIT	NPO	EFO		BAO	CHEBI	NPO
STUDY ASSAYS
Study Assay Measurement Type	size	adsorption	agglomeration	crystal structure	dissolution	dissolution	dissolution	logP	reactivity	shape	size	size	solubility	surface area	zeta potential
Study Assay Measurement Type Term Accession Number	http://purl.org/obo/owl/PATO#PATO_0000117	http://scai.fraunhofer.de/HuPSON#SCAIVPH_00000896	http://purl.bioontology.org/ontology/npo#NPO_1966	http://semanticscience.org/resource/SIO_001100	http://purl.bioontology.org/ontology/npo#NPO_1955	http://purl.bioontology.org/ontology/npo#NPO_1955	http://purl.bioontology.org/ontology/npo#NPO_1955	http://www.bioassayontology.org/bao#BAO_0002130		http://purl.bioontology.org/ontology/npo#NPO_274	http://purl.org/obo/owl/PATO#PATO_0000117	http://purl.org/obo/owl/PATO#PATO_0000117	http://purl.obolibrary.org/obo/CHMO_0002815	http://purl.bioontology.org/ontology/npo#NPO_1235	http://purl.bioontology.org/ontology/npo#NPO_1302
Study Assay Measurement Type Term Source REF	NPO	HUPSON	NPO	SIO	NPO	NPO	NPO	BAO		NPO	NPO	NPO	CHMO	NPO	NPO
Study Assay Technology Type	transmission electron microscopy	gas chromatography mass spectrometry	Average agglomeration number determined via a combination of technologies: BET gas adsorption and dynamic light scattering.	X-ray diffraction	inductively coupled plasma mass spectrometry	absorption spectroscopy	inductively coupled plasma mass spectrometry	high-performance liquid chromatography	gas chromatography-mass spectrometry	transmission electron microscopy	dynamic light scattering	environmental scanning electron microscopy	generator column technique	BET gas adsorption	laser Doppler velocimetry
Study Assay Technology Type Term Accession Number	http://purl.bioontology.org/ontology/npo#NPO_1430	http://purl.obolibrary.org/obo/OBI_0200199		http://purl.obolibrary.org/obo/CHMO_0000156	http://purl.obolibrary.org/obo/CHMO_0000538	http://purl.bioontology.org/ontology/npo#NPO_1710	http://purl.obolibrary.org/obo/CHMO_0000538	http://purl.obolibrary.org/obo/CHMO_0001009	http://purl.obolibrary.org/obo/CHMO_0000497	http://purl.bioontology.org/ontology/npo#NPO_1430	http://purl.bioontology.org/ontology/npo#NPO_1469	http://purl.obolibrary.org/obo/CHMO_0000076			http://purl.obolibrary.org/obo/CHMO_0002043
Study Assay Technology Type Term Source REF	NPO	OBI		CHMO	CHMO	NPO	CHMO	CHMO	CHMO	NPO	NPO	CHMO			CHMO
Study Assay Technology Platform
Study Assay Measurement Name	size;diameter;length	adsorption constant;adsorption percentage;equilibrium adsorption percentage	average agglomeration number	Amorphous phase proportion; Major crystalline phase; Major crystalline phase proportion; Minor crystalline phase; Minor crystalline phase proportion	analyte concentration; analyte saturate concentration	fraction dissolved; equilibrium fraction dissolved	overall dissolution rate; forward dissolution rate	logP	concentration of analyte; rate of change; rate constant; quantum yield	shape; aspect ratio	hydrodynamic diameter; polydispersity index	diameter	solubility	specific surface area	zeta potential
Study Assay Measurement Name Term Accession Number	http://purl.org/obo/owl/PATO#PATO_0000117;http://purl.org/obo/owl/PATO#PATO_0001334; http://purl.org/obo/owl/PATO#PATO_0000122							http://www.bioassayontology.org/bao#BAO_0002130		http://purl.bioontology.org/ontology/npo#NPO_274; http://purl.bioontology.org/ontology/npo#NPO_1365	http://purl.bioontology.org/ontology/npo#NPO_1915; http://purl.bioontology.org/ontology/npo#NPO_1155	http://purl.org/obo/owl/PATO#PATO_0001334	http://purl.obolibrary.org/obo/CHMO_0002815		http://purl.bioontology.org/ontology/npo#NPO_1302
Study Assay Measurement Name Term Source REF	NPO;NPO;NPO							BAO		NPO;NPO	NPO;NPO	NPO	CHMO		NPO
Study Assay File Name	a_TOY.article_PC_size_TEM.xls	a_TOY.article_PC_adsorption_gas.chromatography.xls	a_TOY.article_PC_AAN_BETapproach.xls	a_TOY.article_PC_crystallinity_XRD.xls	a_TOY.article_PC_dissolution.conc_of.Ti4+_dialysisSeparation_ICP-MS.xls	a_TOY.article_PC_dissolution.fraction-dissolved_NoSeparation_AbsSpec.xls	a_TOY.article_PC_dissolution.rate_of.TiO2_dialysisSeparation_ICP-MS.xls	a_TOY.article_PC_logP_HPLC.xls	a_TOY.article_PC_reactivity.rateofchange_of.H2O2_CapillaryColumnSeparation.xls	a_TOY.article_PC_shape_TEM.xls	a_TOY.article_PC_size_DLS.xls	a_TOY.article_PC_size_ESEM.xls	a_TOY.article_PC_solubility_generator.column.xls	a_TOY.article_PC_surfacearea_BET.xls	a_TOY.article_PC_zetapotential_LDV.xls
STUDY PROTOCOLS
Study Protocol Name	nanomaterial sample preparation for specific surface area determination by BET gas adsorption	nanomaterial sample preparation for solubility determination by generator column technique	nanomaterial sample preparation for hydrogen peroxide production reactivity assay	nanomaterial sample preparation for logP determination by HPLC	nanomaterial sample preparation for dissolution assays	nanomaterial sample preparation for crystallinity determination by X-ray diffraction	nanomaterial sample preparation for determination of average agglomeration number	nanomaterial sample preparation for adsorption determination	nanomaterial sample preparation for DLS	nanomaterial sample preparation for environmental scanning electron microscopy	nanomaterial sample preparation for TEM	nanomaterial sample preparation for zeta potential determination	size determination by TEM	adsorption determination by gas chromatography mass spectrometry	determination of average agglomeration number from specific surface area obtained via BET gas adsorption, median diameter obtained via dynamic light scattering and particle density obtained via density of bulk TiO2 taken from CRC Handbook of Chemistry and Physics as per Cohen et al. 2014 [doi:10.1186/1743-8977-11-20]	crystallinity determination by X-ray diffraction	dissolution concentration of Ti4+ cation separated by dialysis and measured by inductively coupled plasma mass spectrometry	determination of fraction dissolved via analysis of titanium dioxide (no separation) and measured by absorption spectroscopy	dissolution rate based on analysis of Ti4+ cation separated by dialysis, measured by inductively coupled plasma mass spectrometry and normalised to the surface area determined via BET gas adsorption	logP determination by HPLC	reactivity based on analysis of hydrogen peroxide separated by capillary column separation, measured by gas chromatography-mass spectrometry	shape determination by transmission electron microscopy	size determination by DLS	size determination by environmental scanning electron microscopy	solubility determination by generator column technique	specific surface area determination by BET gas adsorption	zeta potential determination by laser Doppler velocimetry
Study Protocol Type	sample preparation	sample preparation	sample preparation	sample preparation	sample preparation	sample preparation	sample preparation	sample preparation	sample preparation	sample preparation	sample preparation	sample preparation	size assay	physicochemical characterization	physicochemical characterization	physicochemical characterization	physicochemical characterization	physicochemical characterization	physicochemical characterization	physicochemical characterization	reactivity assay	shape characterization	size assay	size assay	physicochemical characterization	physicochemical characterization	physicochemical characterization
Study Protocol Type Term Accession Number	http://purl.bioontology.org/ontology/npo#NPO_1489	http://purl.bioontology.org/ontology/npo#NPO_1489	http://purl.bioontology.org/ontology/npo#NPO_1489	http://purl.bioontology.org/ontology/npo#NPO_1489	http://purl.bioontology.org/ontology/npo#NPO_1489	http://purl.bioontology.org/ontology/npo#NPO_1489	http://purl.bioontology.org/ontology/npo#NPO_1489	http://purl.bioontology.org/ontology/npo#NPO_1489	http://purl.bioontology.org/ontology/npo#NPO_1489	http://purl.bioontology.org/ontology/npo#NPO_1489	http://purl.bioontology.org/ontology/npo#NPO_1489	http://purl.bioontology.org/ontology/npo#NPO_1489	http://purl.bioontology.org/ontology/npo#NPO_1912	http://purl.bioontology.org/ontology/npo#NPO_1356	http://purl.bioontology.org/ontology/npo#NPO_1356	http://purl.bioontology.org/ontology/npo#NPO_1356	http://purl.bioontology.org/ontology/npo#NPO_1356	http://purl.bioontology.org/ontology/npo#NPO_1356	http://purl.bioontology.org/ontology/npo#NPO_1356	http://purl.bioontology.org/ontology/npo#NPO_1356		http://purl.bioontology.org/ontology/npo#NPO_1361	http://purl.bioontology.org/ontology/npo#NPO_1912	http://purl.bioontology.org/ontology/npo#NPO_1912	http://purl.bioontology.org/ontology/npo#NPO_1356	http://purl.bioontology.org/ontology/npo#NPO_1356	http://purl.bioontology.org/ontology/npo#NPO_1356
Study Protocol Type Term Source REF	NPO	NPO	NPO	NPO	NPO	NPO	NPO	NPO	NPO	NPO	NPO	NPO	NPO	NPO	NPO	NPO	NPO	NPO	NPO	NPO		NPO	NPO	NPO	NPO	NPO	NPO
Study Protocol Description														In this hypothetical example, adsorption constants were determined via analysing the concentration of probe species before and after adsorption to the nanomaterial using gas chromatography mass spectrometry according to the protocol described by Chen et al. ACS Nano, 2014, 8 (9), pp 9446–9456.	Average agglomeration number (an estimate of the average number of primary particles contained within agglomerates) is calculated via dividing the equivalent spherical volume corresponding to the median particle size under a given set of suspension conditions (determined in this hypothetical scenario using dynamic light scattering) by the average equivalent spherical volume, corresponding to the …					The partition coefficient determination approach of Jafvert et al. 2008 [http://dx.doi.org/10.1021/es702809a] was employed.	The photochemical production of hydrogen peroxide at the air-illuminated nanomaterial interface was studied. Hydrogen peroxide was collected at various time points from the illuminated nanomaterial sample, following separation via a capillary column, and its concentration determined using gas chromatography-mass spectrometry. This protocol was the same as that employed by Hoffman et al. 1994 [htt…			Size determination by environmental scanning electron microscopy was carried out as per Han et al. 2009	The generator column technique was applied to determine solubility as per Jafvert et al. 2008 [http://dx.doi.org/10.1021/es702809a]
Study Protocol URI														http://dx.doi.org/10.1021/nn503573s	https://archive.org/details/nistrecommendedp9603unse					http://dx.doi.org/10.1021/es702809a	http://dx.doi.org/10.1021/es00054a006			http://dx.doi.org/10.1016/j.surfcoat.2009.05.046	http://dx.doi.org/10.1021/es702809a
Study Protocol Version
Study Protocol Parameters Name													Instrument;Instrument Version;instrument vendor	Instrument;Instrument Version;instrument vendor	size assay;density estimation approach;Instrument;Instrument Version;instrument vendor	Instrument;Instrument Version;instrument vendor	separation technique;separation pore size;analyte role;Instrument;Instrument Version;instrument vendor	separation technique;separation pore size;analyte role;Instrument;Instrument Version;instrument vendor	surface area measurement technique;separation technique;separation pore size;analyte role;Instrument;Instrument Version;instrument vendor	Instrument;Instrument Version;instrument vendor	type of reaction;reaction role of analyte;surface area measurement technique;separation technique; separation pore size;analyte role;Instrument;Instrument Version;instrument vendor	Instrument;Instrument Version;instrument vendor	Instrument;Instrument Version;instrument vendor	Instrument;Instrument Version;instrument vendor	Instrument;Instrument Version;instrument vendor	Instrument;Instrument Version;instrument vendor	Instrument;Instrument Version;instrument vendor
Study Protocol Parameters Name Term Accession Number													http://www.mygrid.org.uk/ontology/JERMOntology#Instrument;;http://nmrML.org/nmrCV#NMR:1001269	http://www.mygrid.org.uk/ontology/JERMOntology#Instrument;;http://nmrML.org/nmrCV#NMR:1001269	http://purl.bioontology.org/ontology/npo#NPO_1912;;http://www.mygrid.org.uk/ontology/JERMOntology#Instrument;;http://nmrML.org/nmrCV#NMR:1001269	http://www.mygrid.org.uk/ontology/JERMOntology#Instrument;;http://nmrML.org/nmrCV#NMR:1001269	http://purl.bioontology.org/ontology/npo#NPO_1416;;http://purl.obolibrary.org/obo/OBI_0000275;http://www.mygrid.org.uk/ontology/JERMOntology#Instrument;;http://nmrML.org/nmrCV#NMR:1001269	http://purl.bioontology.org/ontology/npo#NPO_1416;;http://purl.obolibrary.org/obo/OBI_0000275;http://www.mygrid.org.uk/ontology/JERMOntology#Instrument;;http://nmrML.org/nmrCV#NMR:1001269	;http://purl.bioontology.org/ontology/npo#NPO_1416;;http://purl.obolibrary.org/obo/OBI_0000275;http://www.mygrid.org.uk/ontology/JERMOntology#Instrument;;http://nmrML.org/nmrCV#NMR:1001269	http://www.mygrid.org.uk/ontology/JERMOntology#Instrument;;http://nmrML.org/nmrCV#NMR:1001269	;;;http://purl.bioontology.org/ontology/npo#NPO_1416;;http://purl.obolibrary.org/obo/OBI_0000275;http://www.mygrid.org.uk/ontology/JERMOntology#Instrument;;http://nmrML.org/nmrCV#NMR:1001269	http://www.mygrid.org.uk/ontology/JERMOntology#Instrument;;http://nmrML.org/nmrCV#NMR:1001269	http://www.mygrid.org.uk/ontology/JERMOntology#Instrument;;http://nmrML.org/nmrCV#NMR:1001269	http://www.mygrid.org.uk/ontology/JERMOntology#Instrument;;http://nmrML.org/nmrCV#NMR:1001269	http://www.mygrid.org.uk/ontology/JERMOntology#Instrument;;http://nmrML.org/nmrCV#NMR:1001269	http://www.mygrid.org.uk/ontology/JERMOntology#Instrument;;http://nmrML.org/nmrCV#NMR:1001269	http://www.mygrid.org.uk/ontology/JERMOntology#Instrument;;http://nmrML.org/nmrCV#NMR:1001269
Study Protocol Parameters Name Term Source REF													JERM;;NMR	JERM;;NMR	NPO;;JERM;;NMR	JERM;;NMR	NPO;;OBI;JERM;;NMR	NPO;;OBI;JERM;;NMR	;NPO;;OBI;JERM;;NMR	JERM;;NMR	;;;NPO;;OBI;JERM;;NMR	JERM;;NMR	JERM;;NMR	JERM;;NMR	JERM;;NMR	JERM;;NMR	JERM;;NMR
Study Protocol Components Name
Study Protocol Components Type
Study Protocol Components Type Term Accession Number
Study Protocol Components Type Term Source REF
STUDY CONTACTS
Study Person Last Name
Study Person First Name
Study Person Mid Initials
Study Person Email
Study Person Phone
Study Person Fax
Study Person Address
Study Person Affiliation
Study Person Roles
Study Person Roles Term Accession Number
Study Person Roles Term Source REF
STUDY
Study Identifier	TOY.article_InVitro.CB
Study Title	In Vitro (cell-based) characterisation of nanomaterials corresponding to this Investigation: TOY.article
Study Description
Study Submission Date
Study Public Release Date
Study Disease
Study Disease Term Accession Number
Study Disease Term Source REF
Study Outcome
Study File Name	s_TOY.article_InVitro.CB.xls
STUDY DESIGN DESCRIPTORS
Study Design Type	in vitro characterization
Study Design Type Term Accession Number	http://purl.bioontology.org/ontology/npo#NPO_1357
Study Design Type Term Source REF	NPO
STUDY PUBLICATIONS
Study PubMed ID
Study Publication DOI
Study Publication Author List
Study Publication Title
Study Publication Status
Study Publication Status Term Accession Number
Study Publication Status Term Source REF
STUDY FACTORS
Study Factor Name	exposure medium Exposure Duration	exposure medium pH value	exposure medium temperature value	exposure medium volume	exposure medium	exposure medium serum concentration	exposure medium serum heat treatment	exposure medium serum organism	exposure medium serum	cells Exposure Duration	dispersant aid concentration	dispersant aid	nanomaterial	screening concentration	Sonication Duration	Sonication Strength	Stirring	vortex shaking	initial cell density	final cell density	confluent	growth phase culture	Sonication	light source	artificial light wavelength classification	artificial light wavelength	culture medium	culture medium glucose supplement	dose per cell	dose	Cell Count	minimum(Sonication Strength)	maximum(Sonication Strength)
Study Factor Type	Exposure Duration	pH value	temperature value	volume	exposure medium	concentration		organism	serum	Exposure Duration	concentration		nanomaterial	screening concentration				vortex shaking	seed density			growth phase culture	Sonication	light		wavelength	culture medium			dose	Cell Count
Study Factor Type Term Accession Number	http://ncicb.nci.nih.gov/xml/owl/EVS/Thesaurus.owl#C83280	http://purl.bioontology.org/ontology/npo#NPO_1814	http://purl.bioontology.org/ontology/npo#NPO_1806	http://purl.org/obo/owl/PATO#PATO_0000918	http://purl.obolibrary.org/obo/ExO_0000083	http://purl.bioontology.org/ontology/npo#NPO_1167		http://purl.obolibrary.org/obo/OBI_0100026	http://purl.obolibrary.org/obo/BTO_0001239	http://ncicb.nci.nih.gov/xml/owl/EVS/Thesaurus.owl#C83280	http://purl.bioontology.org/ontology/npo#NPO_1167		http://purl.bioontology.org/ontology/npo#NPO_199	http://www.bioassayontology.org/bao#BAO_0000098				http://purl.bioontology.org/ontology/npo#NPO_1952	http://livercancer.imbi.uni-heidelberg.de/ccont#CCONT_0000079			http://purl.obolibrary.org/obo/BTO_0001900	http://ncicb.nci.nih.gov/xml/owl/EVS/Thesaurus.owl#C81871	http://www.ebi.ac.uk/efo/EFO_0000568		http://www.bioassayontology.org/bao#BAO_0000565	http://www.bioassayontology.org/bao#BAO_0000114			http://www.ebi.ac.uk/efo/EFO_0000428	http://ncicb.nci.nih.gov/xml/owl/EVS/Thesaurus.owl#C48938
Study Factor Type Term Source REF	NCIT	NPO	NPO	NPO	EXO	NPO		EFO	BTO	NCIT	NPO		NPO	BAO				NPO	CCONT			BTO	NCIT	EFO		BAO	BAO			EFO	NCIT
STUDY ASSAYS
Study Assay Measurement Type	cell viability	cell viability	Oxidative Stress	Toxicology: Genotoxicity
Study Assay Measurement Type Term Accession Number	http://purl.bioontology.org/ontology/npo#NPO_1343	http://purl.bioontology.org/ontology/npo#NPO_1343	http://ncicb.nci.nih.gov/xml/owl/EVS/Thesaurus.owl#C17741	http://ncicb.nci.nih.gov/xml/owl/EVS/Thesaurus.owl#C79377
Study Assay Measurement Type Term Source REF	NPO	NPO	NCIT	NCIT
Study Assay Technology Type	MTS reduction assay	MTT reduction assay	reduced glutathione/oxidized glutathione enzyme recycling assay	Ames Assay
Study Assay Technology Type Term Accession Number	http://www.bioassayontology.org/bao#BAO_0002456	http://www.bioassayontology.org/bao#BAO_0002457	http://purl.obolibrary.org/obo/MMO_0000558	http://ncicb.nci.nih.gov/xml/owl/EVS/Thesaurus.owl#C16235
Study Assay Technology Type Term Source REF	BAO	BAO	MMO	NCIT
Study Assay Technology Platform
Study Assay Measurement Name	percent cytotoxicity; LC50; LD50; LOEL	percent cytotoxicity; LC50; LD50; LOEL	increase in biomarker level; LOEL	increase in biomarker level; study call
Study Assay Measurement Name Term Accession Number	http://www.bioassayontology.org/bao#BAO_0000006;http://www.bioassayontology.org/bao#BAO_0002145;http://www.bioassayontology.org/bao#BAO_0002117;	http://www.bioassayontology.org/bao#BAO_0000006;http://www.bioassayontology.org/bao#BAO_0002145;http://www.bioassayontology.org/bao#BAO_0002117;	;	;
Study Assay Measurement Name Term Source REF	BAO;BAO;BAO;	BAO;BAO;BAO;	;	;
Study Assay File Name	a_TOY.article_cytotoxicity.cell-viability_MTS.xls	a_TOY.article_cytotoxicity.cell-viability_MTT.xls	a_TOY.article_cytotoxicity.sub-lethal_glutathione.xls	a_TOY.article_genotoxicity_Ames.xls
STUDY PROTOCOLS
Study Protocol Name	nanomaterial sample component preparation for MTS assay	nanomaterial sample component preparation for MTT assay	nanomaterial sample component preparation for oxidative stress assessment by glutathione depletion assay	nanomaterial sample component preparation for genotoxicity assessment by Ames test	biological sample component preparation for MTS assay	biological sample component preparation for MTT assay	biological sample component preparation for oxidative stress assessment by glutathione depletion assay	biological sample component preparation for genotoxicity assessment by Ames test	cell viability assay by MTS assay	cell viability assay by MTT assay	oxidative stress assessment by glutathione depletion assay	genotoxicity assessment by Ames test (following exposure with S9 mix)	genotoxicity assessment by Ames test (following exposure without S9 mix)	genotoxicity assessment by Ames test (derivation of overall study call)
Study Protocol Type	sample preparation	sample preparation	sample preparation	sample preparation	sample preparation	sample preparation	sample preparation	sample preparation	cell viability assay	cell viability assay	oxidative stress assay	genotoxicity assay	genotoxicity assay	genotoxicity assay
Study Protocol Type Term Accession Number	http://purl.bioontology.org/ontology/npo#NPO_1489	http://purl.bioontology.org/ontology/npo#NPO_1489	http://purl.bioontology.org/ontology/npo#NPO_1489	http://purl.bioontology.org/ontology/npo#NPO_1489	http://purl.bioontology.org/ontology/npo#NPO_1489	http://purl.bioontology.org/ontology/npo#NPO_1489	http://purl.bioontology.org/ontology/npo#NPO_1489	http://purl.bioontology.org/ontology/npo#NPO_1489	http://www.bioassayontology.org/bao#BAO_0003009	http://www.bioassayontology.org/bao#BAO_0003009	http://www.bioassayontology.org/bao#BAO_0002168	http://www.bioassayontology.org/bao#BAO_0002167	http://www.bioassayontology.org/bao#BAO_0002167	http://www.bioassayontology.org/bao#BAO_0002167
Study Protocol Type Term Source REF	NPO	NPO	NPO	NPO	NPO	NPO	NPO	NPO	BAO	BAO	BAO	BAO	BAO	BAO
Study Protocol Description												Ames test carried out according to OECD test guideline 471 (including S9 mix): the number of revertant colonies per plate was measured	Ames test carried out according to OECD test guideline 471 (without S9 mix): the number of revertant colonies per plate was measured	Ames test carried out according to OECD test guideline 471: an overall positive result (denoted here by a "study call") was determined on the basis of a reproducible increase in the number of revertant colonies per plate at a single concentration for any of the strains tested with or without "S9 mix"
Study Protocol URI												http://dx.doi.org/10.1787/9789264071247-en	http://dx.doi.org/10.1787/9789264071247-en	http://dx.doi.org/10.1787/9789264071247-en
Study Protocol Version
Study Protocol Parameters Name									Instrument;Instrument Version;instrument vendor;background control;negative control;positive control	Instrument;Instrument Version;instrument vendor;background control;negative control;positive control	Instrument;Instrument Version;instrument vendor;background control;negative control;positive control;Biomarker	Instrument;Instrument Version;instrument vendor;background control;negative control;positive control;Biomarker	Instrument;Instrument Version;instrument vendor;background control;negative control;positive control;Biomarker	Instrument;Instrument Version;instrument vendor;background control;negative control;positive control;Biomarker
Study Protocol Parameters Name Term Accession Number									http://www.mygrid.org.uk/ontology/JERMOntology#Instrument;;http://nmrML.org/nmrCV#NMR:1001269;http://www.bioassayontology.org/bao#BAO_0000334;http://www.bioassayontology.org/bao#BAO_0000079;http://www.bioassayontology.org/bao#BAO_0000080	http://www.mygrid.org.uk/ontology/JERMOntology#Instrument;;http://nmrML.org/nmrCV#NMR:1001269;http://www.bioassayontology.org/bao#BAO_0000334;http://www.bioassayontology.org/bao#BAO_0000079;http://www.bioassayontology.org/bao#BAO_0000080	http://www.mygrid.org.uk/ontology/JERMOntology#Instrument;;http://nmrML.org/nmrCV#NMR:1001269;http://www.bioassayontology.org/bao#BAO_0000334;http://www.bioassayontology.org/bao#BAO_0000079;http://www.bioassayontology.org/bao#BAO_0000080;http://ncicb.nci.nih.gov/xml/owl/EVS/Thesaurus.owl#C16342	http://www.mygrid.org.uk/ontology/JERMOntology#Instrument;;http://nmrML.org/nmrCV#NMR:1001269;http://www.bioassayontology.org/bao#BAO_0000334;http://www.bioassayontology.org/bao#BAO_0000079;http://www.bioassayontology.org/bao#BAO_0000080;http://ncicb.nci.nih.gov/xml/owl/EVS/Thesaurus.owl#C16342	http://www.mygrid.org.uk/ontology/JERMOntology#Instrument;;http://nmrML.org/nmrCV#NMR:1001269;http://www.bioassayontology.org/bao#BAO_0000334;http://www.bioassayontology.org/bao#BAO_0000079;http://www.bioassayontology.org/bao#BAO_0000080;http://ncicb.nci.nih.gov/xml/owl/EVS/Thesaurus.owl#C16342	http://www.mygrid.org.uk/ontology/JERMOntology#Instrument;;http://nmrML.org/nmrCV#NMR:1001269;http://www.bioassayontology.org/bao#BAO_0000334;http://www.bioassayontology.org/bao#BAO_0000079;http://www.bioassayontology.org/bao#BAO_0000080;http://ncicb.nci.nih.gov/xml/owl/EVS/Thesaurus.owl#C16342
Study Protocol Parameters Name Term Source REF									JERM;;NMR;BAO;BAO;BAO	JERM;;NMR;BAO;BAO;BAO	JERM;;NMR;BAO;BAO;BAO;NCIT	JERM;;NMR;BAO;BAO;BAO;NCIT	JERM;;NMR;BAO;BAO;BAO;NCIT	JERM;;NMR;BAO;BAO;BAO;NCIT
Study Protocol Components Name
Study Protocol Components Type
Study Protocol Components Type Term Accession Number
Study Protocol Components Type Term Source REF
STUDY CONTACTS
Study Person Last Name
Study Person First Name
Study Person Mid Initials
Study Person Email
Study Person Phone
Study Person Fax
Study Person Address
Study Person Affiliation
Study Person Roles
Study Person Roles Term Accession Number
Study Person Roles Term Source REF

## Sheet: Allowed Values - Parameters
IMPORTANT: CORRESPONDING COLUMN ENTRIES INDICATE ALLOWED COMBINATIONS
Comment	Study Protocol Parameters Name	Study Protocol Parameters Name Term Accession Number	Study Protocol Parameters Name Term Source REF
Should correspond to a sample preparation protocol for a physicochemical or in vitro assay
Corresponds to most physicochemical/structural assay protocols [see this column for exceptions]	Instrument;Instrument Version;instrument vendor	http://www.mygrid.org.uk/ontology/JERMOntology#Instrument;;http://nmrML.org/nmrCV#NMR:1001269	JERM;;NMR
Corresponds to in vitro/in vivo assay protocols based on the following generic "Protocol REF" values: cell viability assay by <Assay technology type>	Instrument;Instrument Version;instrument vendor;background control;negative control;positive control	http://www.mygrid.org.uk/ontology/JERMOntology#Instrument;;http://nmrML.org/nmrCV#NMR:1001269;http://www.bioassayontology.org/bao#BAO_0000334;http://www.bioassayontology.org/bao#BAO_0000079;http://www.bioassayontology.org/bao#BAO_0000080	JERM;;NMR;BAO;BAO;BAO
Corresponds to physicochemical/structural assay protocols based on the following generic "Protocol REF": determination of average agglomeration number from specific surface area obtained via BET gas adsorption, median diameter obtained via <size assay> and particle density obtained via <density estimation approach>	size assay;density estimation approach;Instrument;Instrument Version;instrument vendor	http://purl.bioontology.org/ontology/npo#NPO_1912;;http://www.mygrid.org.uk/ontology/JERMOntology#Instrument;;http://nmrML.org/nmrCV#NMR:1001269	NPO;;JERM;;NMR
Corresponds to in vitro/in vivo assay protocols based on the following generic "Protocol REF" values: <type of sub-lethal cytotoxicity> assessment by <Assay technology type>; genotoxicity assessment by <Assay technology type>	Instrument;Instrument Version;instrument vendor;background control;negative control;positive control;Biomarker	http://www.mygrid.org.uk/ontology/JERMOntology#Instrument;;http://nmrML.org/nmrCV#NMR:1001269;http://www.bioassayontology.org/bao#BAO_0000334;http://www.bioassayontology.org/bao#BAO_0000079;http://www.bioassayontology.org/bao#BAO_0000080;http://ncicb.nci.nih.gov/xml/owl/EVS/Thesaurus.owl#C16342	JERM;;NMR;BAO;BAO;BAO;NCIT
Corresponds to physicochemical/structural assay protocols based on the following generic "Protocol REF": dissolution concentration of <analyte role> separated by <Separation Technique> and measured by <Assay technology type>; determination of fraction dissolved via analysis of <analyte role> separated by <Separation Technique> and measured by <Assay technology type>	separation technique;separation pore size;analyte role;Instrument;Instrument Version;instrument vendor	http://purl.bioontology.org/ontology/npo#NPO_1416;;http://purl.obolibrary.org/obo/OBI_0000275;http://www.mygrid.org.uk/ontology/JERMOntology#Instrument;;http://nmrML.org/nmrCV#NMR:1001269	NPO;;OBI;JERM;;NMR
Corresponds to physicochemical/structural assay protocols based on the following generic "Protocol REF": dissolution rate based on analysis of <analyte role> separated by <Separation Technique>, measured by <Assay technology type> and normalised to the surface area determined via <Surface Area Measurement Technique>; reactivity based on analysis of <analyte role> separated by <Separation Techniqu…	surface area measurement technique;separation technique;separation pore size;analyte role;Instrument;Instrument Version;instrument vendor	;http://purl.bioontology.org/ontology/npo#NPO_1416;;http://purl.obolibrary.org/obo/OBI_0000275;http://www.mygrid.org.uk/ontology/JERMOntology#Instrument;;http://nmrML.org/nmrCV#NMR:1001269	;NPO;;OBI;JERM;;NMR
Corresponds to physicochemical/structural assay protocols based on the following generic "Protocol REF": reactivity based on analysis of <analyte role> separated by <Separation Technique>, measured by <Assay technology type> and normalised to the surface area determined via <Surface Area Measurement Technique>	type of reaction;reaction role of analyte;surface area measurement technique;separation technique; separation pore size;analyte role;Instrument;Instrument Version;instrument vendor	;;;http://purl.bioontology.org/ontology/npo#NPO_1416;;http://purl.obolibrary.org/obo/OBI_0000275;http://www.mygrid.org.uk/ontology/JERMOntology#Instrument;;http://nmrML.org/nmrCV#NMR:1001269	;;;NPO;;OBI;JERM;;NMR

## Sheet: Allowed Values - Protocol Type 
IMPORTANT: CORRESPONDING COLUMN ENTRIES INDICATE ALLOWED COMBINATIONS
Comment	Study Protocol Type	Study Protocol Type Term Accession Number	Study Protocol Type Term Source REF
Study Protocol Name: any kind of sample preparation	sample preparation	http://purl.bioontology.org/ontology/npo#NPO_1489	NPO
	size assay	http://purl.bioontology.org/ontology/npo#NPO_1912	NPO
	physicochemical characterization	http://purl.bioontology.org/ontology/npo#NPO_1356	NPO
	shape characterization	http://purl.bioontology.org/ontology/npo#NPO_1361	NPO
	cell viability assay	http://www.bioassayontology.org/bao#BAO_0003009	BAO
	in vitro characterization	http://purl.bioontology.org/ontology/npo#NPO_1357	NPO
	oxidative stress assay	http://www.bioassayontology.org/bao#BAO_0002168	BAO
	reactivity assay

## Sheet: Allowed Values - GLP
GLP
TRUE
FALSE
