# Supplementary material for: An ISA-TAB-Nano based data collection framework to support data-driven modelling of nanotoxicology
Source: publisher site journal article supplement (doi:10.3762/bjnano.6.202), 2015-10-05
Supplement: Additional file 1 [file ImageLink_1_for_TOY.article.xls]

## Sheet: ImageLink
Image ID	Reference URI	Image Name	Permission Obtained for Reuse	Comment
1	http://www.made-up-article-address.org/figure3	Figure 3(A)	N	Made up transmission electron microscopy image of nanomaterial sample prepared from TiO2_TOY.article

## Sheet: AllowedValues
permission
Y
N
