# Supplementary material for: An ISA-TAB-Nano based data collection framework to support data-driven modelling of nanotoxicology
Source: publisher site journal article supplement (doi:10.3762/bjnano.6.202), 2015-10-05
Supplement: Additional file 1 [file m_fullerene_TOY.article.xls]

## Sheet: Material file
Material Source Name	Material Name	Material Description	Material Synthesis	Material Type	Term Accession Number	Term Source REF	Material Chemical Name	Term Accession Number	Term Source REF	Characteristics [component proportion]	Unit	Term Accession Number	Term Source REF	Characteristics [surface charge {NPO: http://purl.bioontology.org/ontology/npo#NPO_1812}]	Characteristics [Amorphous phase proportion]	Unit	Term Accession Number	Term Source REF	Characteristics [Major crystalline phase]	Term Accession Number	Term Source REF	Characteristics [Major crystalline phase proportion]	Unit	Term Accession Number	Term Source REF	Characteristics [Minor crystalline phase]	Term Accession Number	Term Source REF	Characteristics [Minor crystalline phase proportion]	Unit	Term Accession Number	Term Source REF	Characteristics [Product impurities found {MEDDRA: http://purl.bioontology.org/ontology/MDR/10069178}]	Term Accession Number	Term Source REF	Characteristics [Impurities proportions]	Unit	Term Accession Number	Term Source REF	Characteristics[purity {NPO: http://purl.bioontology.org/ontology/npo#NPO_1345}]	Unit	Term Accession Number	Term Source REF	Characteristics [average size]	Unit	Term Accession Number	Term Source REF	Characteristics [minimum size]	Unit
fullerene_TOY.article	fullerene_TOY.article			nanomaterial; fullerene	http://purl.bioontology.org/ontology/npo#NPO_199; http://purl.obolibrary.org/obo/CHEBI_33416	NPO; CHEBI	C60 fullerene	http://purl.obolibrary.org/obo/CHEBI_33128	CHEBI	N/A	N/A	N/A	N/A
[truncated: 63 more columns]

## Sheet: Allowed Values
Comment[numerical characteristic name: from graph]	Shape:value	Shape:ontology.term.accession.number	Shape:ontology.reference	Shape:comment
FALSE
TRUE	conical shape	http://purl.bioontology.org/ontology/npo#NPO_515	NPO
N/A	cylindrical shape	http://purl.bioontology.org/ontology/npo#NPO_100	NPO
	disc-shaped	http://purl.bioontology.org/ontology/npo#NPO_307	NPO
	rod-shaped	http://purl.bioontology.org/ontology/npo#NPO_461	NPO
	needle shape	http://purl.bioontology.org/ontology/npo#NPO_852	NPO
	ellipsoidal shape	http://purl.bioontology.org/ontology/npo#NPO_156	NPO
	spherical shape	http://purl.bioontology.org/ontology/npo#NPO_286	NPO
	spheroidal shape	http://purl.bioontology.org/ontology/npo#NPO_320	NPO
	oblate spheroidal shape	http://purl.bioontology.org/ontology/npo#NPO_241	NPO
	prolate spheroidal shape	http://purl.bioontology.org/ontology/npo#NPO_102	NPO
	elliptical shape	http://purl.bioontology.org/ontology/npo#NPO_850	NPO
	circular shape	http://purl.bioontology.org/ontology/npo#NPO_342	NPO
	polyhedral shape	http://purl.bioontology.org/ontology/npo#NPO_858	NPO
	hexahedral shape	http://purl.bioontology.org/ontology/npo#NPO_666	NPO
	cubical shape	http://purl.bioontology.org/ontology/npo#NPO_861	NPO
	other
