# Supplementary material for: An ISA-TAB-Nano based data collection framework to support data-driven modelling of nanotoxicology
Source: publisher site journal article supplement (doi:10.3762/bjnano.6.202), 2015-10-05
Supplement: Additional file 1 [file m_TiO2_TOY.article.xls]

## Sheet: Material file
Material Source Name	Material Name	Material Description	Material Synthesis	Material Type	Term Accession Number	Term Source REF	Material Chemical Name	Term Accession Number	Term Source REF	Characteristics [component proportion]	Unit	Term Accession Number	Term Source REF	Characteristics [surface charge {NPO: http://purl.bioontology.org/ontology/npo#NPO_1812}]	Characteristics [Amorphous phase proportion]	Unit	Term Accession Number	Term Source REF	Characteristics [Major crystalline phase]	Term Accession Number	Term Source REF	Characteristics [Major crystalline phase proportion]	Unit	Term Accession Number	Term Source REF	Characteristics [Minor crystalline phase]	Term Accession Number	Term Source REF	Characteristics [Minor crystalline phase proportion]	Unit	Term Accession Number	Term Source REF	Characteristics [Product impurities found {MEDDRA: http://purl.bioontology.org/ontology/MDR/10069178}]	Term Accession Number	Term Source REF	Characteristics [Impurities proportions]	Unit	Term Accession Number	Term Source REF	Characteristics[purity {NPO: http://purl.bioontology.org/ontology/npo#NPO_1345}]	Unit	Term Accession Number	Term Source REF	Characteristics [average size]	Unit	Term Accession Number	Term Source REF	Characteristics [minimum size]	Unit
TiO2_TOY.article	TiO2_TOY.article	*N.B. Please note the following explanation which is presented prior to the text which is specific to this hypothetical nanomaterial. As explained in “NanoPUZZLES_ISA-TAB-Nano-Supporting Information-final.pdf”, certain Material file "Characteristics [...]" fields referring to basic chemical composition information ("component proportion", "Product impurities found", "Impurities proportions","puri…		nanomaterial; metal oxide	http://purl.bioontology.org/ontology/npo#NPO_199 ; http://purl.bioontology.org/ontology/npo#NPO_1540	NPO; NPO				N/A	N/A	N/A	N/A	negative																										99	percent	http://purl.obolibrary.org/obo/UO_0000187	UO	20	nanometer	http://purl.obolibrary.org/obo/UO_0000018	UO
TiO2_TOY.article	TiO2_TOY.article	*N.B. Please note the following explanation which is presented prior to the text which is specific to this hypothetical nanomaterial. As explained in “NanoPUZZLES_ISA-TAB-Nano-Supporting Information-final.pdf”, certain Material file "Characteristics [...]" fields referring to basic chemical composition information ("component proportion", "Product impurities found", "Impurities proportions","puri…		nanomaterial; metal oxide	http://purl.bioontology.org/ontology/npo#NPO_199 ; http://purl.bioontology.org/ontology/npo#NPO_1540	NPO; NPO				N/A	N/A	N/A	N/A	negative																										99	percent	http://purl.obolibrary.org/obo/UO_0000187	UO	20	nanometer	http://purl.obolibrary.org/obo/UO_0000018	UO
TiO2_TOY.article	TiO2_TOY.article	*N.B. Please note the following explanation which is presented prior to the text which is specific to this hypothetical nanomaterial. As explained in “NanoPUZZLES_ISA-TAB-Nano-Supporting Information-final.pdf”, certain Material file "Characteristics [...]" fields referring to basic chemical composition information ("component proportion", "Product impurities found", "Impurities proportions","puri…		nanomaterial; metal oxide	http://purl.bioontology.org/ontology/npo#NPO_199 ; http://purl.bioontology.org/ontology/npo#NPO_1540	NPO; NPO				N/A	N/A	N/A	N/A	negative																										99	percent	http://purl.obolibrary.org/obo/UO_0000187	UO	20	nanometer	http://purl.obolibrary.org/obo/UO_0000018	UO
TiO2_TOY.article	TiO2_core			core; metal oxide	http://purl.bioontology.org/ontology/npo#NPO_1617; http://purl.bioontology.org/ontology/npo#NPO_1540	NPO; NPO	titanium oxide nanoparticle	http://purl.bioontology.org/ontology/npo#NPO_1486	NPO	90	molar percentage				0	percent	http://purl.obolibrary.org/obo/UO_0000187	UO	rutile			100	percent	http://purl.obolibrary.org/obo/UO_0000187	UO
TiO2_TOY.article	silica_shell			shell	http://purl.bioontology.org/ontology/npo#NPO_760	NPO	silica shell	http://purl.bioontology.org/ontology/npo#NPO_1873	NPO	5	molar percentage				100	percent	http://purl.obolibrary.org/obo/UO_0000187	UO															iron;silver	http://purl.bioontology.org/ontology/npo#NPO_568; http://purl.bioontology.org/ontology/npo#NPO_736	NPO;NPO	0.1; 0.2	percent; percent	http://purl.obolibrary.org/obo/UO_0000187; http://purl.obolibrary.org/obo/UO_0000187	UO;UO
TiO2_TOY.article	surface_ligands			surface group	http://purl.bioontology.org/ontology/npo#NPO_1894	NPO	carboxyl group	http://purl.org/obo/owl/CHEBI#CHEBI_46883	NPO	1	molar percentage
TiO2_TOY.article	DAXAD_dispersant_aid			dispersant aid			DAXAD			4	molar percentage
[truncated: 63 more columns]

## Sheet: Allowed Values
Comment[numerical characteristic name: from graph]	Shape:value	Shape:ontology.term.accession.number	Shape:ontology.reference	Shape:comment
FALSE
TRUE	conical shape	http://purl.bioontology.org/ontology/npo#NPO_515	NPO
N/A	cylindrical shape	http://purl.bioontology.org/ontology/npo#NPO_100	NPO
	disc-shaped	http://purl.bioontology.org/ontology/npo#NPO_307	NPO
	rod-shaped	http://purl.bioontology.org/ontology/npo#NPO_461	NPO
	needle shape	http://purl.bioontology.org/ontology/npo#NPO_852	NPO
	ellipsoidal shape	http://purl.bioontology.org/ontology/npo#NPO_156	NPO
	spherical shape	http://purl.bioontology.org/ontology/npo#NPO_286	NPO
	spheroidal shape	http://purl.bioontology.org/ontology/npo#NPO_320	NPO
	oblate spheroidal shape	http://purl.bioontology.org/ontology/npo#NPO_241	NPO
	prolate spheroidal shape	http://purl.bioontology.org/ontology/npo#NPO_102	NPO
	elliptical shape	http://purl.bioontology.org/ontology/npo#NPO_850	NPO
	circular shape	http://purl.bioontology.org/ontology/npo#NPO_342	NPO
	polyhedral shape	http://purl.bioontology.org/ontology/npo#NPO_858	NPO
	hexahedral shape	http://purl.bioontology.org/ontology/npo#NPO_666	NPO
	cubical shape	http://purl.bioontology.org/ontology/npo#NPO_861	NPO
	other
