# Supplementary material for: An ISA-TAB-Nano based data collection framework to support data-driven modelling of nanotoxicology
Source: publisher site journal article supplement (doi:10.3762/bjnano.6.202), 2015-10-05
Supplement: Additional file 1 [file s_TOY.article_InVitro.CB.xls]

## Sheet: Study file_InVitro_cell-based
Source Name	Material Type	Term Accession Number	Term Source Ref	Characteristics[cell type {EFO:http://www.ebi.ac.uk/efo/EFO_0000324}]	Term Accession Number	Term Source Ref	Characteristics[cell line {EFO:http://www.ebi.ac.uk/efo/EFO_0000322}]	Term Accession Number	Term Source Ref	Characteristics[organism {EFO: http://purl.obolibrary.org/obo/OBI_0100026}]	Term Accession Number	Term Source Ref	Characteristics[strain {EFO: http://www.ebi.ac.uk/efo/EFO_0005135}]	Term Accession Number	Term Source Ref	Protocol REF	Protocol REF	Sample Name	Comment [literature background for "initial cell density", "final cell density", "growth phase culture" and "confluent" status]	Comment [additional information about the cell type]	Comment ["culture medium", "exposure medium", "exposure medium volume", "dose" and "dispersant aid" values for Ames test]	Factor Value[culture medium]	Term Accession Number	Term Source Ref	Factor Value[culture medium glucose supplement]	Factor Value[initial cell density]	Unit	Factor Value[final cell density]	Unit	Term Accession Number	Term Source Ref	Factor Value[confluent]	Factor Value[growth phase culture]	Term Accession Number	Term Source Ref	Factor Value[Cell Count]	Factor Value[nanomaterial]	Factor Value[screening concentration]	Unit	Term Accession Number	Term Source Ref	Factor Value[dose per cell]	Unit	Factor Value[dose]	Unit	Term Accession Number	Term Source Ref	Factor Value[exposure medium]	Term Accession Number
cells_0	biological specimen	http://purl.bioontology.org/ontology/npo#NPO_1998	NPO	airway epithelial cell	http://purl.obolibrary.org/obo/CL_0002368	EFO	A549	http://www.ebi.ac.uk/efo/EFO_0001086	EFO	Homo sapiens	http://purl.obolibrary.org/obo/NCBITaxon_9606	EFO				nanomaterial sample component preparation for MTS assay	biological sample component preparation for MTS assay	s_TOY.article_InVitro.CB_0	Examples of information regarding "initial cell density" (or "seeding density"), the description of a final cell density ("80% confluent") and the description of cells being studied in the "exponential growth phase" (corresponding to the BRENDA Tissue and Enzyme Source Ontology preferred name of "logarithmic phase culture") may be found in Murdock et al. 2008 [DOI: 10.1093/toxsci/kfm240] and Kim …	http://www.lgcstandards-atcc.org/products/all/CCL-185.aspx?geo_country=gb	N/A	DMEM (medium)	http://purl.org/obo/owl/IEV#IEV_0000304	CCONT	TRUE	15000	cells per well	80	confluence percentage	http://purl.obolibrary.org/obo/UO_0000194	UO		logarithmic phase culture	http://purl.obolibrary.org/obo/BTO_0001903	BTO		TiO2_TOY.article	25	microgram per 10^6 cells			25	microgram per 10^6 cells					DMEM (medium);fetal bovine serum	http://purl.org/obo/owl/IEV#IEV_0000304;http://livercancer.imbi.uni-heidelberg.de/ccont#CCONT_0000048
cells_0	biological specimen	http://purl.bioontology.org/ontology/npo#NPO_1998	NPO	airway epithelial cell	http://purl.obolibrary.org/obo/CL_0002368	EFO	A549	http://www.ebi.ac.uk/efo/EFO_0001086	EFO	Homo sapiens	http://purl.obolibrary.org/obo/NCBITaxon_9606	EFO				nanomaterial sample component preparation for MTS assay	biological sample component preparation for MTS assay	s_TOY.article_InVitro.CB_1	Examples of information regarding "initial cell density" (or "seeding density"), the description of a final cell density ("80% confluent") and the description of cells being studied in the "exponential growth phase" (corresponding to the BRENDA Tissue and Enzyme Source Ontology preferred name of "logarithmic phase culture") may be found in Murdock et al. 2008 [DOI: 10.1093/toxsci/kfm240] and Kim …	http://www.lgcstandards-atcc.org/products/all/CCL-185.aspx?geo_country=gb	N/A	DMEM (medium)	http://purl.org/obo/owl/IEV#IEV_0000304	CCONT	TRUE	15000	cells per well	80	confluence percentage	http://purl.obolibrary.org/obo/UO_0000194	UO		logarithmic phase culture	http://purl.obolibrary.org/obo/BTO_0001903	BTO		TiO2_TOY.article	50	microgram per 10^6 cells			50	microgram per 10^6 cells					DMEM (medium);fetal bovine serum	http://purl.org/obo/owl/IEV#IEV_0000304;http://livercancer.imbi.uni-heidelberg.de/ccont#CCONT_0000048
cells_0	biological specimen	http://purl.bioontology.org/ontology/npo#NPO_1998	NPO	airway epithelial cell	http://purl.obolibrary.org/obo/CL_0002368	EFO	A549	http://www.ebi.ac.uk/efo/EFO_0001086	EFO	Homo sapiens	http://purl.obolibrary.org/obo/NCBITaxon_9606	EFO				nanomaterial sample component preparation for MTS assay	biological sample component preparation for MTS assay	s_TOY.article_InVitro.CB_derived:0,1	Examples of information regarding "initial cell density" (or "seeding density"), the description of a final cell density ("80% confluent") and the description of cells being studied in the "exponential growth phase" (corresponding to the BRENDA Tissue and Enzyme Source Ontology preferred name of "logarithmic phase culture") may be found in Murdock et al. 2008 [DOI: 10.1093/toxsci/kfm240] and Kim …	http://www.lgcstandards-atcc.org/products/all/CCL-185.aspx?geo_country=gb	N/A	DMEM (medium)	http://purl.org/obo/owl/IEV#IEV_0000304	CCONT	TRUE	15000	cells per well	80	confluence percentage	http://purl.obolibrary.org/obo/UO_0000194	UO		logarithmic phase culture	http://purl.obolibrary.org/obo/BTO_0001903	BTO		TiO2_TOY.article											DMEM (medium);fetal bovine serum	http://purl.org/obo/owl/IEV#IEV_0000304;http://livercancer.imbi.uni-heidelberg.de/ccont#CCONT_0000048
cells_1	biological specimen	http://purl.bioontology.org/ontology/npo#NPO_1998	NPO	kidney cell	http://purl.obolibrary.org/obo/CL_1000497	EFO	primary cell line	http://www.ebi.ac.uk/efo/EFO_0003064	EFO	Homo sapiens	http://purl.obolibrary.org/obo/NCBITaxon_9606	EFO				nanomaterial sample component preparation for MTT assay	biological sample component preparation for MTT assay	s_TOY.article_InVitro.CB_2	An example of a cell culture being described as "confluent", without detailed information regarding the "initial cell density", "final cell density", or "growth phase culture" can be found in the NanoCare Project Final Scientific Report (2009) [http://www.nanopartikel.info/files/projekte/NanoCare/NanoCare_Final_Report.pdf]		N/A	Ham's F-12 medium	http://purl.org/obo/owl/IEV#IEV_0000339	CCONT	TRUE							TRUE					TiO2_TOY.article	0.1	milligram per liter	http://purl.obolibrary.org/obo/UO_0000273	UO			0.0002	milligram	http://purl.obolibrary.org/obo/UO_0000022	UO	Ham's F-12 medium;fetal bovine serum; horse serum	http://purl.org/obo/owl/IEV#IEV_0000339;http://livercancer.imbi.uni-heidelberg.de/ccont#CCONT_0000048; http://livercancer.imbi.uni-heidelberg.de/ccont#CCONT_0000058
cells_1	biological specimen	http://purl.bioontology.org/ontology/npo#NPO_1998	NPO	kidney cell	http://purl.obolibrary.org/obo/CL_1000497	EFO	primary cell line	http://www.ebi.ac.uk/efo/EFO_0003064	EFO	Homo sapiens	http://purl.obolibrary.org/obo/NCBITaxon_9606	EFO				nanomaterial sample component preparation for MTT assay	biological sample component preparation for MTT assay	s_TOY.article_InVitro.CB_3	An example of a cell culture being described as "confluent", without detailed information regarding the "initial cell density", "final cell density", or "growth phase culture" can be found in the NanoCare Project Final Scientific Report (2009) [http://www.nanopartikel.info/files/projekte/NanoCare/NanoCare_Final_Report.pdf]		N/A	Ham's F-12 medium	http://purl.org/obo/owl/IEV#IEV_0000339	CCONT	TRUE							TRUE					TiO2_TOY.article	0.2	milligram per liter	http://purl.obolibrary.org/obo/UO_0000273	UO			0.0004	milligram	http://purl.obolibrary.org/obo/UO_0000022	UO	Ham's F-12 medium;fetal bovine serum; horse serum	http://purl.org/obo/owl/IEV#IEV_0000339;http://livercancer.imbi.uni-heidelberg.de/ccont#CCONT_0000048; http://livercancer.imbi.uni-heidelberg.de/ccont#CCONT_0000058
cells_1	biological specimen	http://purl.bioontology.org/ontology/npo#NPO_1998	NPO	kidney cell	http://purl.obolibrary.org/obo/CL_1000497	EFO	primary cell line	http://www.ebi.ac.uk/efo/EFO_0003064	EFO	Homo sapiens	http://purl.obolibrary.org/obo/NCBITaxon_9606	EFO				nanomaterial sample component preparation for MTT assay	biological sample component preparation for MTT assay	s_TOY.article_InVitro.CB_4	An example of a cell culture being described as "confluent", without detailed information regarding the "initial cell density", "final cell density", or "growth phase culture" can be found in the NanoCare Project Final Scientific Report (2009) [http://www.nanopartikel.info/files/projekte/NanoCare/NanoCare_Final_Report.pdf]		N/A	Ham's F-12 medium	http://purl.org/obo/owl/IEV#IEV_0000339	CCONT	TRUE							TRUE					TiO2_TOY.article	0.3	milligram per liter	http://purl.obolibrary.org/obo/UO_0000273	UO			0.0006	milligram	http://purl.obolibrary.org/obo/UO_0000022	UO	Ham's F-12 medium;fetal bovine serum; horse serum	http://purl.org/obo/owl/IEV#IEV_0000339;http://livercancer.imbi.uni-heidelberg.de/ccont#CCONT_0000048; http://livercancer.imbi.uni-heidelberg.de/ccont#CCONT_0000058
cells_1	biological specimen	http://purl.bioontology.org/ontology/npo#NPO_1998	NPO	kidney cell	http://purl.obolibrary.org/obo/CL_1000497	EFO	primary cell line	http://www.ebi.ac.uk/efo/EFO_0003064	EFO	Homo sapiens	http://purl.obolibrary.org/obo/NCBITaxon_9606	EFO				nanomaterial sample component preparation for MTT assay	biological sample component preparation for MTT assay	s_TOY.article_InVitro.CB_derived:2,3,4	An example of a cell culture being described as "confluent", without detailed information regarding the "initial cell density", "final cell density", or "growth phase culture" can be found in the NanoCare Project Final Scientific Report (2009) [http://www.nanopartikel.info/files/projekte/NanoCare/NanoCare_Final_Report.pdf]		N/A	Ham's F-12 medium	http://purl.org/obo/owl/IEV#IEV_0000339	CCONT	TRUE							TRUE					TiO2_TOY.article											Ham's F-12 medium;fetal bovine serum; horse serum	http://purl.org/obo/owl/IEV#IEV_0000339;http://livercancer.imbi.uni-heidelberg.de/ccont#CCONT_0000048; http://livercancer.imbi.uni-heidelberg.de/ccont#CCONT_0000058
cells_1	biological specimen	http://purl.bioontology.org/ontology/npo#NPO_1998	NPO	kidney cell	http://purl.obolibrary.org/obo/CL_1000497	EFO	primary cell line	http://www.ebi.ac.uk/efo/EFO_0003064	EFO	Homo sapiens	http://purl.obolibrary.org/obo/NCBITaxon_9606	EFO				nanomaterial sample component preparation for oxidative stress assessment by glutathione depletion assay	biological sample component preparation for oxidative stress assessment by glutathione depletion assay	s_TOY.article_InVitro.CB_5	An example of a cell culture being described as "confluent", without detailed information regarding the "initial cell density", "final cell density", or "growth phase culture" can be found in the NanoCare Project Final Scientific Report (2009) [http://www.nanopartikel.info/files/projekte/NanoCare/NanoCare_Final_Report.pdf]		N/A	Ham's F-12 medium	http://purl.org/obo/owl/IEV#IEV_0000339	CCONT	TRUE							TRUE					TiO2_TOY.article	0.1	milligram per liter									Ham's F-12 medium	http://purl.org/obo/owl/IEV#IEV_0000339
S_Typhimurium_TA97a	biological specimen	http://purl.bioontology.org/ontology/npo#NPO_1998	NPO	bacterial cell						Salmonella enterica subsp. enterica serovar Typhimurium	http://purl.obolibrary.org/obo/NCBITaxon_90371	EFO	TA97a			nanomaterial sample component preparation for genotoxicity assessment by Ames test	biological sample component preparation for genotoxicity assessment by Ames test	s_TOY.article_InVitro.CB_6			These values were based on Shinohara et al. 2009 [DOI:10.1016/j.toxlet.2009.09.012]. Since the "Factor Value [exposure medium]" was designed to capture the entire exposure medium, all liquid components of the mixture (containing the tested nanomaterial) are described using this field. The individual component volumes are given in "Factor Value [exposure medium volume]", although the cumulative vo…	Oxoid nutrient broth															TiO2_TOY.article							50	microgram per plate			Oxoid nutrient broth; deionized water; phosphate buffer saline; molten top agar	; http://purl.bioontology.org/ontology/npo#NPO_1848; http://purl.bioontology.org/ontology/npo#NPO_1846;
S_Typhimurium_TA98	biological specimen	http://purl.bioontology.org/ontology/npo#NPO_1998	NPO	bacterial cell						Salmonella enterica subsp. enterica serovar Typhimurium	http://purl.obolibrary.org/obo/NCBITaxon_90371	EFO	TA98			nanomaterial sample component preparation for genotoxicity assessment by Ames test	biological sample component preparation for genotoxicity assessment by Ames test	s_TOY.article_InVitro.CB_7			These values were based on Shinohara et al. 2009 [DOI:10.1016/j.toxlet.2009.09.012]. Since the "Factor Value [exposure medium]" was designed to capture the entire exposure medium, all liquid components of the mixture (containing the tested nanomaterial) are described using this field. The individual component volumes are given in "Factor Value [exposure medium volume]", although the cumulative vo…	Oxoid nutrient broth															TiO2_TOY.article							50	microgram per plate			Oxoid nutrient broth; deionized water; phosphate buffer saline; molten top agar	; http://purl.bioontology.org/ontology/npo#NPO_1848; http://purl.bioontology.org/ontology/npo#NPO_1846;
S_Typhimurium_TA97a	biological specimen	http://purl.bioontology.org/ontology/npo#NPO_1998	NPO	bacterial cell						Salmonella enterica subsp. enterica serovar Typhimurium	http://purl.obolibrary.org/obo/NCBITaxon_90371	EFO	TA97a			nanomaterial sample component preparation for genotoxicity assessment by Ames test	biological sample component preparation for genotoxicity assessment by Ames test	s_TOY.article_InVitro.CB_8			These values were based on Shinohara et al. 2009 [DOI:10.1016/j.toxlet.2009.09.012]. Since the "Factor Value [exposure medium]" was designed to capture the entire exposure medium, all liquid components of the mixture (containing the tested nanomaterial) are described using this field. The individual component volumes are given in "Factor Value [exposure medium volume]", although the cumulative vo…	Oxoid nutrient broth															TiO2_TOY.article							50	microgram per plate			Oxoid nutrient broth; deionized water; S9 mix; molten top agar	; http://purl.bioontology.org/ontology/npo#NPO_1848;;
S_Typhimurium_TA98	biological specimen	http://purl.bioontology.org/ontology/npo#NPO_1998	NPO	bacterial cell						Salmonella enterica subsp. enterica serovar Typhimurium	http://purl.obolibrary.org/obo/NCBITaxon_90371	EFO	TA98			nanomaterial sample component preparation for genotoxicity assessment by Ames test	biological sample component preparation for genotoxicity assessment by Ames test	s_TOY.article_InVitro.CB_9			These values were based on Shinohara et al. 2009 [DOI:10.1016/j.toxlet.2009.09.012]. Since the "Factor Value [exposure medium]" was designed to capture the entire exposure medium, all liquid components of the mixture (containing the tested nanomaterial) are described using this field. The individual component volumes are given in "Factor Value [exposure medium volume]", although the cumulative vo…	Oxoid nutrient broth															TiO2_TOY.article							50	microgram per plate			Oxoid nutrient broth; deionized water; S9 mix; molten top agar	; http://purl.bioontology.org/ontology/npo#NPO_1848;;
S_Typhimurium_TA97a_and_S_Typhimurium_TA98	biological specimen	http://purl.bioontology.org/ontology/npo#NPO_1998	NPO	bacterial cell						Salmonella enterica subsp. enterica serovar Typhimurium	http://purl.obolibrary.org/obo/NCBITaxon_90371	EFO				nanomaterial sample component preparation for genotoxicity assessment by Ames test	biological sample component preparation for genotoxicity assessment by Ames test	s_TOY.article_InVitro.CB_derived:6,7,8,9				Oxoid nutrient broth															TiO2_TOY.article							50	microgram per plate
[truncated: 52 more columns]

## Sheet: AllowedValues
light source	artificial light wavelength classification	boolean_always_applicable	boolean_sometimes_not_applicable	Material Type.value	Material Type.OntologyID	Material Type.Ontology
none (i.e. period prior to assay measurements was spent in the dark)	visible	TRUE	TRUE	biological specimen	http://purl.bioontology.org/ontology/npo#NPO_1998	NPO
background only (default)	ultraviolet	FALSE	FALSE
artificial only	N/A		N/A
background and artificial
