# Supplementary material for: An ISA-TAB-Nano based data collection framework to support data-driven modelling of nanotoxicology
Source: publisher site journal article supplement (doi:10.3762/bjnano.6.202), 2015-10-05
Supplement: Additional file 1 [file s_TOY.article_PC.xls]

## Sheet: Study file_physicochemical
Source Name	Protocol REF	Sample Name	Comment [Sonication]	Factor Value [physical state]	Term Accession Number	Term Source Ref	Factor Value[particle concentration]	Unit	Term Accession Number	Term Source Ref	Factor Value[medium]	Term Accession Number	Term Source Ref	Factor Value[blood serum]	Term Accession Number	Term Source Ref	Factor Value[blood serum concentration]	Unit	Term Accession Number	Term Source Ref	Factor Value[blood serum heat treatment]	Factor Value[blood serum organism]	Term Accession Number	Term Source Ref	Factor Value[medium Exposure Duration]	Unit	Term Accession Number	Term Source Ref	Factor Value[Sonication]	Factor Value[Sonication Strength]	Unit	Term Accession Number	Term Source Ref	Factor Value[Sonication Duration]	Unit	Term Accession Number	Term Source Ref	Factor Value[Stirring]	Factor Value[vortex shaking]	Factor Value[dispersant aid]	Term Accession Number	Term Source Ref	Factor Value[dispersant aid concentration]	Unit	Term Accession Number	Term Source Ref	Factor Value[light source]	Factor Value[artificial light wavelength classification]	Factor Value[artificial light wavelength]
TiO2_TOY.article	nanomaterial sample preparation for TEM	s_TOY.article_PC_1		state of suspension	http://purl.bioontology.org/ontology/npo#NPO_1506	NPO	0.1	microgram per liter	http://purl.obolibrary.org/obo/UO_0000301	UO	deionized water	http://purl.bioontology.org/ontology/npo#NPO_1848	NPO																TRUE	35	watt	http://purl.obolibrary.org/obo/UO_0000114	UO	30	second	http://purl.obolibrary.org/obo/UO_0000010	UO	FALSE	FALSE								background only (default)	N/A
TiO2_TOY.article	nanomaterial sample preparation for environmental scanning electron microscopy	s_TOY.article_PC_2		state of suspension	http://purl.bioontology.org/ontology/npo#NPO_1506	NPO	0.1	microgram per liter	http://purl.obolibrary.org/obo/UO_0000301	UO	deionized water	http://purl.bioontology.org/ontology/npo#NPO_1848	NPO																TRUE	35	watt	http://purl.obolibrary.org/obo/UO_0000114	UO	30	second	http://purl.obolibrary.org/obo/UO_0000010	UO	FALSE	FALSE								background only (default)	N/A
TiO2_TOY.article	nanomaterial sample preparation for DLS	s_TOY.article_PC_3		state of suspension	http://purl.bioontology.org/ontology/npo#NPO_1506	NPO	0.1	microgram per liter	http://purl.obolibrary.org/obo/UO_0000301	UO	deionized water	http://purl.bioontology.org/ontology/npo#NPO_1848	NPO																TRUE	35	watt	http://purl.obolibrary.org/obo/UO_0000114	UO	30	second	http://purl.obolibrary.org/obo/UO_0000010	UO	FALSE	FALSE								background only (default)	N/A
TiO2_TOY.article	nanomaterial sample preparation for zeta potential determination	s_TOY.article_PC_4		state of suspension	http://purl.bioontology.org/ontology/npo#NPO_1506	NPO	0.1	microgram per liter	http://purl.obolibrary.org/obo/UO_0000301	UO	deionized water	http://purl.bioontology.org/ontology/npo#NPO_1848	NPO																TRUE	35	watt	http://purl.obolibrary.org/obo/UO_0000114	UO	30	second	http://purl.obolibrary.org/obo/UO_0000010	UO	FALSE	FALSE								background only (default)	N/A
TiO2_TOY.article	nanomaterial sample preparation for specific surface area determination by BET gas adsorption	s_TOY.article_PC_5		state of suspension	http://purl.bioontology.org/ontology/npo#NPO_1506	NPO	0.1	microgram per liter	http://purl.obolibrary.org/obo/UO_0000301	UO	deionized water	http://purl.bioontology.org/ontology/npo#NPO_1848	NPO																TRUE	35	watt	http://purl.obolibrary.org/obo/UO_0000114	UO	30	second	http://purl.obolibrary.org/obo/UO_0000010	UO	FALSE	FALSE								background only (default)	N/A
fullerene_TOY.article	nanomaterial sample preparation for solubility determination by generator column technique	s_TOY.article_PC_6		state of suspension	http://purl.bioontology.org/ontology/npo#NPO_1506	NPO					deionized water	http://purl.bioontology.org/ontology/npo#NPO_1848	NPO																TRUE	35	watt	http://purl.obolibrary.org/obo/UO_0000114	UO	30	second	http://purl.obolibrary.org/obo/UO_0000010	UO	FALSE	FALSE								background only (default)	N/A
TiO2_TOY.article	nanomaterial sample preparation for hydrogen peroxide production reactivity assay	s_TOY.article_PC_7		state of suspension	http://purl.bioontology.org/ontology/npo#NPO_1506	NPO	0.1	microgram per liter	http://purl.obolibrary.org/obo/UO_0000301	UO	deionized water	http://purl.bioontology.org/ontology/npo#NPO_1848	NPO												1	minute	http://purl.obolibrary.org/obo/UO_0000031	UO	TRUE	35	watt	http://purl.obolibrary.org/obo/UO_0000114	UO	30	second	http://purl.obolibrary.org/obo/UO_0000010	UO	FALSE	FALSE								artificial only	visible	500
TiO2_TOY.article	nanomaterial sample preparation for hydrogen peroxide production reactivity assay	s_TOY.article_PC_8		state of suspension	http://purl.bioontology.org/ontology/npo#NPO_1506	NPO	0.1	microgram per liter	http://purl.obolibrary.org/obo/UO_0000301	UO	deionized water	http://purl.bioontology.org/ontology/npo#NPO_1848	NPO												100	minute	http://purl.obolibrary.org/obo/UO_0000031	UO	TRUE	35	watt	http://purl.obolibrary.org/obo/UO_0000114	UO	30	second	http://purl.obolibrary.org/obo/UO_0000010	UO	FALSE	FALSE								artificial only	visible	500
TiO2_TOY.article	nanomaterial sample preparation for hydrogen peroxide production reactivity assay	s_TOY.article_PC_9		state of suspension	http://purl.bioontology.org/ontology/npo#NPO_1506	NPO	0.1	microgram per liter	http://purl.obolibrary.org/obo/UO_0000301	UO	deionized water	http://purl.bioontology.org/ontology/npo#NPO_1848	NPO												500	minute	http://purl.obolibrary.org/obo/UO_0000031	UO	TRUE	35	watt	http://purl.obolibrary.org/obo/UO_0000114	UO	30	second	http://purl.obolibrary.org/obo/UO_0000010	UO	FALSE	FALSE								artificial only	visible	500
TiO2_TOY.article	nanomaterial sample preparation for hydrogen peroxide production reactivity assay	s_TOY.article_PC_derived:7,8,9		state of suspension	http://purl.bioontology.org/ontology/npo#NPO_1506	NPO	0.1	microgram per liter	http://purl.obolibrary.org/obo/UO_0000301	UO	deionized water	http://purl.bioontology.org/ontology/npo#NPO_1848	NPO																TRUE	35	watt	http://purl.obolibrary.org/obo/UO_0000114	UO	30	second	http://purl.obolibrary.org/obo/UO_0000010	UO	FALSE	FALSE								artificial only	visible	500
fullerene_TOY.article	nanomaterial sample preparation for logP determination by HPLC	s_TOY.article_PC_10	In this hypothetical example, sonication of the original stock suspension was carried out, but "Factor Value [Sonication]" = FALSE, in keeping with the NanoPUZZLES business rule that “Factor Value […]” columns in the Study file refer to those values which are applicable to the sample prepared immediately prior to application of an assay protocol.	state of suspension	http://purl.bioontology.org/ontology/npo#NPO_1506	NPO	0.1	microgram per liter	http://purl.obolibrary.org/obo/UO_0000301	UO	deionized water; octanol	http://purl.bioontology.org/ontology/npo#NPO_1848 ; http://purl.obolibrary.org/obo/CHEBI_37868	NPO ; CHEBI																FALSE									FALSE	FALSE								background only (default)	N/A
TiO2_TOY.article	nanomaterial sample preparation for dissolution assays	s_TOY.article_PC_11		state of suspension	http://purl.bioontology.org/ontology/npo#NPO_1506	NPO	0.1	microgram per liter	http://purl.obolibrary.org/obo/UO_0000301	UO	deionized water	http://purl.bioontology.org/ontology/npo#NPO_1848	NPO												10	minute	http://purl.obolibrary.org/obo/UO_0000031	UO	TRUE	35	watt	http://purl.obolibrary.org/obo/UO_0000114	UO	30	second	http://purl.obolibrary.org/obo/UO_0000010	UO	FALSE	FALSE								background only (default)	N/A
TiO2_TOY.article	nanomaterial sample preparation for dissolution assays	s_TOY.article_PC_12		state of suspension	http://purl.bioontology.org/ontology/npo#NPO_1506	NPO	0.1	microgram per liter	http://purl.obolibrary.org/obo/UO_0000301	UO	deionized water	http://purl.bioontology.org/ontology/npo#NPO_1848	NPO												11	minute	http://purl.obolibrary.org/obo/UO_0000031	UO	TRUE	35	watt	http://purl.obolibrary.org/obo/UO_0000114	UO	30	second	http://purl.obolibrary.org/obo/UO_0000010	UO	FALSE	FALSE								background only (default)	N/A
TiO2_TOY.article	nanomaterial sample preparation for dissolution assays	s_TOY.article_PC_13		state of suspension	http://purl.bioontology.org/ontology/npo#NPO_1506	NPO	0.1	microgram per liter	http://purl.obolibrary.org/obo/UO_0000301	UO	deionized water	http://purl.bioontology.org/ontology/npo#NPO_1848	NPO												12	minute	http://purl.obolibrary.org/obo/UO_0000031	UO	TRUE	35	watt	http://purl.obolibrary.org/obo/UO_0000114	UO	30	second	http://purl.obolibrary.org/obo/UO_0000010	UO	FALSE	FALSE								background only (default)	N/A
TiO2_TOY.article	nanomaterial sample preparation for dissolution assays	s_TOY.article_PC_14		state of suspension	http://purl.bioontology.org/ontology/npo#NPO_1506	NPO	0.1	microgram per liter	http://purl.obolibrary.org/obo/UO_0000301	UO	deionized water	http://purl.bioontology.org/ontology/npo#NPO_1848	NPO												13	minute	http://purl.obolibrary.org/obo/UO_0000031	UO	TRUE	35	watt	http://purl.obolibrary.org/obo/UO_0000114	UO	30	second	http://purl.obolibrary.org/obo/UO_0000010	UO	FALSE	FALSE								background only (default)	N/A
TiO2_TOY.article	nanomaterial sample preparation for dissolution assays	s_TOY.article_PC_15		state of suspension	http://purl.bioontology.org/ontology/npo#NPO_1506	NPO	0.1	microgram per liter	http://purl.obolibrary.org/obo/UO_0000301	UO	deionized water	http://purl.bioontology.org/ontology/npo#NPO_1848	NPO												20	minute	http://purl.obolibrary.org/obo/UO_0000031	UO	TRUE	35	watt	http://purl.obolibrary.org/obo/UO_0000114	UO	30	second	http://purl.obolibrary.org/obo/UO_0000010	UO	FALSE	FALSE								background only (default)	N/A
TiO2_TOY.article	nanomaterial sample preparation for dissolution assays	s_TOY.article_PC_16		state of suspension	http://purl.bioontology.org/ontology/npo#NPO_1506	NPO	0.1	microgram per liter	http://purl.obolibrary.org/obo/UO_0000301	UO	deionized water	http://purl.bioontology.org/ontology/npo#NPO_1848	NPO												30	minute	http://purl.obolibrary.org/obo/UO_0000031	UO	TRUE	35	watt	http://purl.obolibrary.org/obo/UO_0000114	UO	30	second	http://purl.obolibrary.org/obo/UO_0000010	UO	FALSE	FALSE								background only (default)	N/A
TiO2_TOY.article	nanomaterial sample preparation for dissolution assays	s_TOY.article_PC_derived:11,12,13,14,15,16		state of suspension	http://purl.bioontology.org/ontology/npo#NPO_1506	NPO	0.1	microgram per liter	http://purl.obolibrary.org/obo/UO_0000301	UO	deionized water	http://purl.bioontology.org/ontology/npo#NPO_1848	NPO																TRUE	35	watt	http://purl.obolibrary.org/obo/UO_0000114	UO	30	second	http://purl.obolibrary.org/obo/UO_0000010	UO	FALSE	FALSE								background only (default)	N/A
TiO2_TOY.article	nanomaterial sample preparation for dissolution assays	s_TOY.article_PC_17		state of suspension	http://purl.bioontology.org/ontology/npo#NPO_1506	NPO	0.1	microgram per liter	http://purl.obolibrary.org/obo/UO_0000301	UO	deionized water	http://purl.bioontology.org/ontology/npo#NPO_1848	NPO												10	minute	http://purl.obolibrary.org/obo/UO_0000031	UO	TRUE	35	watt	http://purl.obolibrary.org/obo/UO_0000114	UO	30	second	http://purl.obolibrary.org/obo/UO_0000010	UO	FALSE	FALSE								background only (default)	N/A
TiO2_TOY.article	nanomaterial sample preparation for crystallinity determination by X-ray diffraction	s_TOY.article_PC_18		powdered state	http://purl.bioontology.org/ontology/npo#NPO_1515	NPO																							TRUE	35	watt	http://purl.obolibrary.org/obo/UO_0000114	UO	30	second	http://purl.obolibrary.org/obo/UO_0000010	UO	FALSE	FALSE								background only (default)	N/A
TiO2_TOY.article	nanomaterial sample preparation for determination of average agglomeration number	s_TOY.article_PC_19		state of suspension	http://purl.bioontology.org/ontology/npo#NPO_1506	NPO	0.1	microgram per liter	http://purl.obolibrary.org/obo/UO_0000301	UO	deionized water	http://purl.bioontology.org/ontology/npo#NPO_1848	NPO																TRUE	35	watt	http://purl.obolibrary.org/obo/UO_0000114	UO	30	second	http://purl.obolibrary.org/obo/UO_0000010	UO	FALSE	FALSE								background only (default)	N/A
TiO2_TOY.article	nanomaterial sample preparation for adsorption determination	s_TOY.article_PC_20		state of suspension	http://purl.bioontology.org/ontology/npo#NPO_1506	NPO	0.1	microgram per liter	http://purl.obolibrary.org/obo/UO_0000301	UO	deionized water	http://purl.bioontology.org/ontology/npo#NPO_1848	NPO																TRUE	35	watt	http://purl.obolibrary.org/obo/UO_0000114	UO	30	second	http://purl.obolibrary.org/obo/UO_0000010	UO	FALSE	FALSE								background only (default)	N/A
[truncated: 10 more columns]

## Sheet: AllowedValues
light source	artificial light wavelength classification	boolean	physical state.values	physical state.TermAccessionNumber	physical state.TermSourceREF
none (i.e. period prior to assay measurements was spent in the dark)	visible	TRUE	state of suspension	http://purl.bioontology.org/ontology/npo#NPO_1506	NPO
background only (default)	ultraviolet	FALSE	powdered state	http://purl.bioontology.org/ontology/npo#NPO_1515	NPO
artificial only	N/A	N/A
background and artificial
